# Supplementary material for: An inhibitory circuit from central amygdala to zona incerta drives pain-related behaviors in mice
Source: eLife. 2022 Oct 21;11:e68760. doi: 10.7554/eLife.68760 (PMC9635874; doi:10.7554/eLife.68760)
Supplement: Figure 1—figure supplement 1—source data 1. [file elife-68760-fig1-figsupp1-data1.xlsx]

## Sheet: Sheet2
					PKCδ-tdTomato								mCherry								ChrimsonR-tdTomato
	Bregma	M1	M2	M3	M4	M5				Bregma	835	832	ET5173	ET5536	ET5340					ET903	ET987	ET4971	ET4972
	-0.58				1					-0.58	0										10
	-0.7									-0.7											51
	-0.82			76		62				-0.82	0	32		43						32	32
	-0.94	70		88		50				-0.94	0	76		37	42					19	50		29
	-1.06	61	96	87	61					-1.06	10	91	27	61	59					27	63	9	52
	-1.22	69	118	98	79	81				-1.22		87	91	91	70					56	58	13	70
	-1.34	113	119	196	73					-1.34	19		63	72	81					53	77	33	65
	-1.46	98	139	186	126	92				-1.46	46	117	68	95	124						62	30	73
	-1.58	130	172	201		112				-1.58	70	100	50							62	36	47	59
	-1.7	56	67	120	97					-1.7	40	67		70	120					71	73	46
	-1.82	37	44	61	47	44				-1.82	27	27		29						28	26	30	36
	-1.94		19	10	16	12				-1.94		15	2	4						7	42	13	5
	-2.06									-2.06										16	17
