# Supplementary material for: An inhibitory circuit from central amygdala to zona incerta drives pain-related behaviors in mice
Source: eLife. 2022 Oct 21;11:e68760. doi: 10.7554/eLife.68760 (PMC9635874; doi:10.7554/eLife.68760)
Supplement: Figure 1—figure supplement 2—source data 1. [file elife-68760-fig1-figsupp2-data1.xlsx]

## Sheet: Sheet2
		Percentage area ZI Terminals
Bregma	ET987	ET4971	ET4972	ET5173	ET5340	ET5536
-1.46	1.6	9.4	4.2	3.8		4.1
-1.58		3.2	3.4	2.6
-1.7	6.2	1.8		1.1
-1.82	0.9	3.2	1			1.8
-1.94	2.2		0.5
-2.06		0.5	0.2
-2.18		0.2	0.3
-2.46	1.5					1.1
-2.54			3.2		0.5	0.5
-2.7		1.7			0.5
