# Supplementary material for: An inhibitory circuit from central amygdala to zona incerta drives pain-related behaviors in mice
Source: eLife. 2022 Oct 21;11:e68760. doi: 10.7554/eLife.68760 (PMC9635874; doi:10.7554/eLife.68760)
Supplement: Figure 2—figure supplement 1—source data 1. [file elife-68760-fig2-figsupp1-data1.xlsx]

## Sheet: Sheet1
Fig 2 Supp 1
Figure 2B
PKCd-tdTomato						CTB-647						MERGE
ET3760			ET3777			ET3760			ET3777			ET3760			ET3777
RC Level	Transduced Cells		RC Level	Transduced Cells		RC Level	Transduced Cells		RC Level	Transduced Cells		RC Level	Co-Labeled Cells		RC Level	Co-Labeled Cells
-0.82			-0.82	61		-0.82			-0.82	9		-0.82			-0.82	0
-0.94	60		-0.94	108		-0.94	50		-0.94	24		-0.94	5		-0.94	2
-1.06	83		-1.06	109		-1.06	94		-1.06	88		-1.06	12		-1.06	2
-1.22	71		-1.22	112		-1.22	71		-1.22	82		-1.22	11		-1.22	11
-1.34	130		-1.34	161		-1.34	111		-1.34	114		-1.34	14		-1.34	23
-1.46	183		-1.46	204		-1.46	115		-1.46	115		-1.46	27		-1.46	28
-1.58	207		-1.58	165		-1.58	108		-1.58	91		-1.58	28		-1.58	21
-1.7	209		-1.7	169		-1.7	120		-1.7	95		-1.7	31		-1.7	35
-1.8	122		-1.8	62		-1.8	61		-1.8	46		-1.8	12		-1.8	0
-1.94	50		-1.94	36		-1.94	13		-1.94	3		-1.94	0		-1.94	3
Merge/PKCd						Merge/CTB-647
ET3760			ET3777			ET3760			ET3777
RC Level	Co-Labeled Cells		RC Level	Co-Labeled Cells		RC Level	Co-Labeled Cells		RC Level	Co-Labeled Cells
-0.82			-0.82	0		-0.82			-0.82	0
-0.94	8.33333		-0.94	1.85185		-0.94	10		-0.94	8.33333
-1.06	14.4578		-1.06	1.83486		-1.06	12.766		-1.06	2.27273
-1.22	15.493		-1.22	9.82143		-1.22	15.493		-1.22	13.4146
-1.34	10.7692		-1.34	14.2857		-1.34	12.6126		-1.34	20.1754
-1.46	14.7541		-1.46	13.7255		-1.46	23.4783		-1.46	24.3478
-1.58	13.5266		-1.58	12.7273		-1.58	25.9259		-1.58	23.0769
-1.7	14.8325		-1.7	20.7101		-1.7	25.8333		-1.7	36.8421
-1.8	9.83607		-1.8	0		-1.8	19.6721		-1.8	0
-1.94	0		-1.94	8.33333		-1.94	0		-1.94	100
