# Supplementary material for: An inhibitory circuit from central amygdala to zona incerta drives pain-related behaviors in mice
Source: eLife. 2022 Oct 21;11:e68760. doi: 10.7554/eLife.68760 (PMC9635874; doi:10.7554/eLife.68760)
Supplement: Figure 2—source data 1. [file elife-68760-fig2-data1.xlsx]

## Sheet: Sheet1
Figure 2
Figure 2B
CTB/PKCd							PKCd/CTB
ET3760			ET3777				ET3760			ET3777
RC Level	Transduced Cells		RC Level	Transduced Cells			RC Level	Transduced Cells		RC Level
-0.82			-0.82	0			-0.82			-0.82	0
-0.94	8.33333		-0.94	1.85185			-0.94	10		-0.94	8.33333
-1.06	14.4578		-1.06	1.83486			-1.06	12.766		-1.06	2.27273
-1.22	15.493		-1.22	9.82143			-1.22	15.493		-1.22	13.4146
-1.34	10.7692		-1.34	14.2857			-1.34	12.6126		-1.34	20.1754
-1.46	14.7541		-1.46	13.7255			-1.46	23.4783		-1.46	24.3478
-1.58	13.5266		-1.58	12.7273			-1.58	25.9259		-1.58	23.0769
-1.7	14.8325		-1.7	20.7101			-1.7	25.8333		-1.7	36.8421
-1.8	9.83607		-1.8	0			-1.8	19.6721		-1.8	0
Figure 2D			Figure 2E			Figure 2F
VGAT- Neurons (n=8)	VGAT+ Neurons (n=12)		ACSF (predrug) (n=7)	Bicuculline (+Bic,10 μM) (n=7)		0 mV (n=10)	(n=10) -70 mV
Paired Pulse Ratios (PPR)			oEPSC Amplitude (pA)			oEPSC Amplitude (pA)
0.761758	0.813953		377.996	302.9		216.889	-17.144
0.761682	0.461538		156.702	41.3		98.952	-13.033
0.249999	0.557377		216.889	28.6		76.73	-0.729
0.436031	0.631179		153.551	48.9		87.352	-41.761
0.243979	0.428571		186.4	14.7		118.503	-15.422
0.24858	0.15388		795	632.4		21.77	-7.339
0.677804	0.072811		610.1	90.6		96.571	-7.934
0.349647	0.589977					24.859	-3.78
	0.657557					81.008	-46.235
	0.446222					94.511	-18.331
	0.480542
	0.699524
Figure 2D	Data Structure	Type of Test	Sample Size	Statistical Data
ex-vivo optogenetics	Normal distribution	Unpaired two-tailed t-test	VGAT-positive = 8 cells	t = 0.3291; df =18; p =0.7459; eta squared = 0.005982
			VGAT-negative = 12 cells
Figure 2E	Data Structure	Type of Test	Sample Size	Statistical Data
ex-vivo optogenetics	Normal distribution	Paired two-tailed t-test	n = 7 cells	t = 3.361; df = 6; p = 0.0152; eta squared = 0.6531
Figure 2F	Data Structure	Type of Test	Sample Size	Statistical Data
ex-vivo optogenetics	Normal distribution	Paired two-tailed t-test	n =10 cells	t = 5.879; df = 9; p = 0.0002; eta squared = 0.7934
