# Supplementary material for: An inhibitory circuit from central amygdala to zona incerta drives pain-related behaviors in mice
Source: eLife. 2022 Oct 21;11:e68760. doi: 10.7554/eLife.68760 (PMC9635874; doi:10.7554/eLife.68760)
Supplement: Figure 3—figure supplement 1—source data 1. [file elife-68760-fig3-figsupp1-data1.xlsx]

## Sheet: Sheet1
Figure 3-Supp
Figure 3C	Acetone
	Ipsilateral												Ipsilateral													Figure 3 - supplemental figure 1C	Data Structure	Type of Test	Sample Size	Statistical Data (Ipsilateral Paw)	Statistical Data (Contralateral Paw)
	Time after i.p. injection	Experimental Condition: Sham-Sal											Time after i.p. injection	Experimental Condition: Cuff-Sal												hM4Di Acetone	Normal distribution	Mixed-effects Model followed by Dunnett's multiple comparision test	n = 8 mice per group	i.p treatment: F(2,40) = 0.2811; p = 0.7564	i.p treatement: F(2,40) = 0.1374; p = 0.8720
		ET8051	ET8052	ET460	ET475	ET 473	ET578	ET472	No ET					ET249	ET467	ET474	ET471	ET465	ET580	ET579	ET573									sciatic nerve treatments: F(3,28) = 95.08; ****p < 0.0001	sciatic nerve treatments: F(3,28) = 0.2550; p = 0.8571
	pre	0.2	0	0	0.2	0.2	0.4	0	0.6				pre	1.8	1.8	2	1.6	2	1.6	1.4	1.8									interaction F(6,40) = 0.5731, p = 0.7493	interaction F(6,40) = 0.2001, p = 0.9748
	1 hr	0.2	0	0.2	0.2	0	0.2	0	1.6				1 hr	1.6	1.4	1.8	1.6	2	2	2	1.8
	1 day	0		0.2		0.2	0						1 day	1.6	1.4	2	1.8		2	1.8
		Experimental Condition: Sham-CNO												Experimental Condition: Cuff-CNO
		ET8052	ET8051	ET475	ET460	ET472	No ET	ET473	ET578					ET249	ET465	ET467	ET474	ET471	ET573	ET580	ET579
	pre	0	0	0.2	0.2	0	1	0.2	0				pre	1.6	1.6	1.4	2	1.8	1.6	2	1.8
	1 hr	0.2	0	0	0	0.2	1.2	0.2	0				1 hr	2	2	1.6	1.6	1.6	1.6	1.8	1.6
	1 day	0		0.2		0	0.6						1 day		2				1.8
	Contralateral												Contralateral
	Time after i.p. injection	Experimental Condition: Sham-Sal											Time after i.p. injection	Experimental Condition: Cuff-Sal												Figure 3 - supplemental figure 1D	Data Structure	Type of Test	Sample Size	Statistical Data (Ipsilateral Paw)	Statistical Data (Contralateral Paw)
		ET8051	ET8052	ET460	ET475	ET 473	ET578	ET472	No ET					ET249	ET467	ET474	ET471	ET465	ET580	ET579	ET573					hM4Di Hargreaves	Normal distribution	Mixed-effects Model followed by Dunnett's multiple comparision test	n = 8 mice per group	i.p treatement: F(2,43) = 0.01655; p = 0.9836	i.p treatment: F(2,43) = 0.01455; p = 0.9856
	pre	0.2	0	0	0.2	0	0	0.2	0.6				pre	0	0	0.2	0.2	0	0.2	0	0.2									sciatic nerve treatments: F(3,28) = 286; ****p < 0.0001	sciatic nerve treatments: F(3,28) = 0.07683; p = 0.9720
	1 hr	0	0	0	0	0	0.2	0	1.6				1 hr	0.2	0	0	0.2	0	0.2	0.2	0.2									interaction F(6,43) = 0.3289, p = 0.9181	interaction F(6,43) = 1.309, p = 0.2738
	1 day	0.2		0.2		0	0.2						1 day	0	0.4	0.2	0		0.2	0
		Experimental Condition: Sham-CNO												Experimental Condition: Cuff-CNO
		ET8052	ET8051	ET462	ET475	ET460	ET472	No ET	ET473	ET578				ET249	ET465	ET467	ET474	ET471	ET573	ET580	ET579
	pre	0	0.2		0	0.2	0	1	0	0.2			pre	0	0.2	0.4	0.2	0	0	0.2	0
	1 hr	0	0		0	0	0.4	1.2	0	0			1 hr	0.2	0	0.2	0	0.2	0	0	0.2
	1 day	0			0.2		0.2	0.6					1 day		0				0.2
Figure 3D	Hargreaves
	Ipsilateral												Ipsilateral
	Time after i.p. injection	Experimental Condition: Sham-Sal											Time after i.p. injection	Experimental Condition: Cuff-Sal
		ET8051	ET8052	ET460	ET475	ET578	ET473	ET472	No ET					ET249	ET471	ET467	ET465	ET474	ET580	ET579	ET573
	pre	7.65	9.24	8.29	7.25	8.33	8.11	8.16	8.4				pre	4.52	4	4.18	3.95	3.9	4.39	3.98	4.5
	1 hr	7.6	7.82	8	7.99	8.29	9.34	9.1	8.2				1 hr	3.93	3.97	4.14	4.09	4.08	4.25	4.41	4.05
	1 day	8.17	8.32			8.03							1 day	4.22	4.05	4.1			4.46	4.39
		Experimental Condition: Sham-CNO												Experimental Condition: Cuff-CNO
		ET8052	ET8051	ET460	ET475	ET473	ET472	No ET	ET578					ET249	ET465	ET474	ET465	ET474	ET573	ET580	ET579
	pre	8.52	8.17	7.85	7.94	8.09	8.5	8.87	8.03				pre	4.35	4.35	4.15	4.1	4.05	4.96	4.46	4.39
	1 hr	8.39	7.7	6.65	7.74	8.67	9.42	9.88	8.49				1 hr	4.14	3.98	3.8	4.11	3.85	4.57	4.38	4.37
	1 day	9.52	8.11	8	7.25	8.11	8.16	8.4					1 day	4.52	3.95	3.9			4.5
	Contralateral												Contralateral
	Time after i.p. injection	Experimental Condition: Sham-Sal											Time after i.p. injection	Experimental Condition: Cuff-Sal
		ET8051	ET8052	ET460	ET475	ET578	ET473	ET472	No ET					ET249	ET471	ET467	ET465	ET474	ET580	ET579	ET573
	pre	8.14	8.15	8.07	8.6	8.35	7.86	8	8.26				pre	6.85	8.05	8.2	8.33	7.91	8.73	8.5	8.83
	1 hr	7.51	8.69	7.74	7.94	7.86	8.39	8.64	7.6				1 hr	8.02	8.27	8.19	7.18	8.54	7.93	8.15	8.9
	1 day	7.89	8.11			9.59							1 day	8.57	8.34	8.35			8.73	8.4
		Experimental Condition: Sham-CNO												Experimental Condition: Cuff-CNO
		ET8052	ET8051	ET460	ET475	ET473	ET472	No ET	ET578					ET249	ET465	ET474	ET465	ET474	ET573	ET580	ET579
	pre	8.47	7.89	8.36	8.35	8.12	8.5	7.73	9.59				pre	7.39	8.45	8.52	8.35	8.17	8.94	8.73	8.4
	1 hr	7.64	7.5	7.7	7.94	8.93	9.99	9.04	9.19				1 hr	8.2	8.17	8.58	8.69	8.34	8.41	8.88	8.57
	1 day	8.15	7.85	8.07	8.6	7.86	8	8.26					1 day	6.85	8.33	7.91			8.83
