# Supplementary material for: An inhibitory circuit from central amygdala to zona incerta drives pain-related behaviors in mice
Source: eLife. 2022 Oct 21;11:e68760. doi: 10.7554/eLife.68760 (PMC9635874; doi:10.7554/eLife.68760)
Supplement: Figure 3—source data 1. [file elife-68760-fig3-data1.xlsx]

## Sheet: Sheet1
Figure 3
Figure 3A
Gi validation in the ZI
Saline			CNO
# of spikes			# of spikes
ACSF	ACSF+saline		ACSF	ACSF+CNO
4	5		2.4	0
2.4	5		4	0
4.4	4.4		2.4	1.8
3.6	2.6		4.4	0
1.6	0.8		3.6	2.6
1.8	3.4		1.8	0.2
Figure 3A	Data Structure	Type of Test	Sample Size	Statistical Data
saline	normal distribution, same variance	paired two-tailed t-test	6 cells	t = 0.98; df = 5; p = 0.3722; eta squared = 0.1611
CNO	non-normal distribution	Wilcoxon two-tailed matched-pairs signed rank test	6 cells	p = 0.0313; W = -21.0
Figure 3C
hM4Di Transduced Cells
ET8051			ET8052		NO ET		ET475		ET474		ET472		ET471		ET467		ET460		ET465
RC Level	Transduced Cells		Transduced Cells		Transduced Cells		Transduced Cells		Transduced Cells		Transduced Cells		Transduced Cells		Transduced Cells		Transduced Cells		Transduced Cells
-1.06																			8
-1.22	11				12		4				18		2		1
-1.34	22		3				13								17
-1.46	45		34		100		54								55
-1.58	57		18				80				120
-1.7					52		101				151				222				18
-1.82	156		80						20		99				211
-1.94			62		171		94				60		58		173		56
-2.06	238								88		76		49		182		125
-2.18			191						49		60				94		168		41
-2.3	275		105						62		79		82				47		64
-2.46			126								23								133
-2.54							32				43		34						109
-2.7
-2.8
VGAT-tdTomato Transduced Cells
ET8381			ET8382		ET8383			ET8384
RC Level	Transduced Cells		Transduced Cells		Transduced Cells
-1.06
-1.22	19		6
-1.34			29
-1.46	125		166		146
-1.58	103		181		117
-1.7	68		109		109
-1.82	65		80		124			103
-1.94
-2.06	237		114					128
-2.18	63		103
-2.3	89		191
-2.46	94		103
-2.54			54
-2.7
-2.8
Figure 3E	VF
	Ipsilateral												Ipsilateral														Figure 3E	Data Structure	Type of Test	Sample Size	Statistical Data (Ipsilateral Paw)	Statistical Data (Contralateral Paw)
	Time after i.p. injection	Experimental Condition: Sham-Sal											Time after i.p. injection	Experimental Condition: Cuff-Sal													hM4Di von Fre	Normal distribution	Mixed-effects Model followed by Dunnett's multiple comparision test	n = 8 mice per group	i.p treatment: F(2,42) = 31.03; ****p < 0.0001	i.p treatment.: F(2,70) = 58; ****p < 0.0001
		ET8052	ET8051	ET475	ET249	ET462	ET461	ET577	ET577					ET474	ET471	ET460	ET475	ET465	ET467	ET578	NO ET										sciatic nerve treatments: F(3,28) = 138.8; ****p < 0.0001	sciatic nerve treatments: F(3,70) = 7.398; ****p < 0.001
	pre	0.68	0.76	0.64	0.48	0.52	0.56	0.6	0.48				pre	0.12	0.14	0.16	0.14	0.16	0.16	0.142	0.142										interaction: F(6,42) = 25.93, ****p < 0.0001	interaction: F(6,70) = 9.426, ****p < 0.0001
	1 hr	0.56	0.76	0.56	0.48	0.48	0.44	0.52	0.64				1 hr	0.16	0.16	0.14	0.14	0.142	0.16	0.124	0.124										posthoc: Dunnett's test, 95.00% CI of diff. = 0.3129 to 0.4571, ****p < 0.0001 for pre-injections vs 1 h after CNO in sham-hM4Di mice.	posthoc: Dunnett's test, 95.00% CI of diff. = 0.2276 to 0.4309, ****p < 0.0001 for pre-injections vs 1 h after CNO in sham-hM4Di mice and 95.00% CI of diff. = 0.2787 to 0.4828, ****p < 0.0001 for pre-injections vs 1 h after CNO in cuff-hM4Di mice
	1 day	0.52	0.76	0.48		0.68							1 day	0.14	0.12	0.12			0.16	0.142
		Experimental Condition: Sham-CNO												Experimental Condition: Cuff-CNO
		ET8051	ET8052	ET467	ET465	ET462	ET462	ET475	ET460					ET471	ET474	NO ET	ET473	ET573	ET580	ET472	ET472
	pre	0.56	0.52	0.56	0.48	0.4	0.6	0.48	0.68				pre	0.14	0.12	0.16	0.12	0.12	0.124	0.16	0.142
	1 hr	0.16	0.16	0.124	0.12	0.136	0.14	0.16	0.2				1 hr	0.14	0.14	0.09	0.106	0.16	0.124	0.142	0.16
	1 day	0.76	0.56	0.48		0.76	0.48	0.6					1 day	0.124	0.14	0.16
																											Figure 3F	Data Structure	Type of Test	Sample Size	Statistical Data (Ipsilateral Paw)	Statistical Data (Contralateral Paw)
																											hM4Di Pinching	Normal distribution	Mixed-effects Model followed by Dunnett's multiple comparision test	Ipsilateral paw-	i.p treatment: F(2,33) = 41.16; ****p < 0.0001	i.p treatment: F(2,30) = 141.8; ****p < 0.0001
	Contralateral												Contralateral																	Sham = 8 mice per group Cuff = 6 mice per group Contralateral paw- Sham = 6 mice per group Cuff = 7 mice per group	sciatic nerve treatments: F(3,24) = 265.4; p<0.0001	sciatic nerve treatments: F(3,22) = 22.05; ****p < 0.0001
	Time after i.p. injection	Experimental Condition: Sham-Sal											Time after i.p. injection	Experimental Condition: Cuff-Sal																	interaction: F(6,33) = 60.75, ****p < 0.0001	interaction: F(6,30) = 37.21, ****p < 0.0001
		ET8052	ET8051	ET475	ET249	ET462	ET461	ET577	ET577					ET474	ET471	ET460	ET475	ET465	ET467	ET578	NO ET										posthoc: Dunnett's test, 95.00% CI of diff. = 73.69 to 92.20, ****p < 0.0001 for pre-injections vs 1 h after CNO in sham-hM4Di mice	posthoc: Dunnett's test, 95.00% CI of diff. = 65.21 to 89.19, ****p < 0.0001 for pre-injections vs 1 h after CNO in sham-hM4Di mice and 95.00% CI of diff. = 57.73 to 79.89, ****p < 0.0001 for pre-injections vs 1 h after CNO in cuff-hM4Di mice
	pre	0.6	0.56	0.56	0.56	0.4	0.52	0.68	0.56				pre	0.56	0.48	0.68	0.48	0.44	0.6	0.44	0.44
	1 hr	0.44	0.6	0.48	0.44	0.48	0.48	0.44	0.52				1 hr	0.52	0.44	0.52	0.48	0.44	0.48	0.124	0.56
	1 day	0.52	0.52	0.4		0.56							1 day	0.48	0.76	0.52			0.48	0.68
		Experimental Condition: Sham-CNO												Experimental Condition: Cuff-CNO
		ET8051	ET8052	Et467	ET465	ET462	ET462	ET475	ET460					ET471	ET474	NO ET	ET473	ET573	ET580	ET472	ET472
	pre	0.56	0.52	0.56	0.4	0.44	0.52	0.44	0.56				pre	0.48	0.52	0.48	0.76	0.52	0.48	0.48	0.68
	1 hr	0.16	0.14	0.14	0.1	0.16	0.256	0.16	0.25				1 hr	0.14	0.16	0.14	0.142	0.25	0.106	0.16	0.256
	1 day	0.56	0.48	0.56		0.52	0.56	0.68					1 day	0.76	0.48	0.44
Figure 3F	RS
	Ipsilateral												Ipsilateral
	Time after i.p. injection	Experimental Condition: Sham-Sal											Time after i.p. injection	Experimental Condition: Cuff-Sal
		ET8052	ET8051	ET475	ET460	NO ET	ET472	ET578	ET473					ET474	ET467	ET465	ET573	ET580	ET579
	pre	165.85	180.85	165.34	164.27	172.78	146.94	171.22	155.17				pre	77.13	74.91	76.08	86.91	75	71.8
	1 hr	175.33	168.23	152.2	165.13	167.66	145	169.04	167.57				1 hr	77	87.31	69.25	72.35	74.2	70.44
	1 day	176.3	179.15	161.13		168.43	153.75						1 day				71.45
		Experimental Condition: Sham-CNO												Experimental Condition: Cuff-CNO
		ET8052	ET8051	ET460	ET475	ET578	ET473	NO ET	ET472					ET467	ET465	ET474	ET580	ET579	ET573
	pre	176.3	179.15	164.23	161.31	173.88	185.61	168.43	153.75				pre	84.8	81.23	70.36	74.33	75.3	71.45
	1 hr	83.25	69.06	96	69.16	92.63	93.48	90.7	104.84				1 hr	84.5	95.81	81.73	77.26	83.1	95.52
	1 day			164.27		171.8	155.17						1 day	74.91	76.08		75	71.8
	Contralateral												Contralateral
	Time after i.p. injection	Experimental Condition: Sham-Sal											Time after i.p. injection	Experimental Condition: Cuff-Sal
		ET475	ET460	NO ET	ET472	ET578	ET473							ET474	ET467	ET465	ET573	ET580	ET579	ET249
	pre	161.69	164.09	167.89	178.04	170.66	167.26						pre	162.2	164.69	160.64	159	154.63	158.57	174.38
	1 hr	163.55	163.04	146.58	150.75	168.31	156						1 hr	164.42	156.95	162.95	147.88	159.36	147.27	180.83
	1 day	158.63		167.04	164.62								1 day				156.65
		Experimental Condition: Sham-CNO												Experimental Condition: Cuff-CNO
		ET460	ET475	ET578	ET473	NO ET	ET472							ET467	ET465	ET474	ET580	ET579	ET573	ET249
	pre	161.58	158.63	166.05	164.17	167.04	164.62						pre	162.04	151.83	161.13	170.38	172.3	156.65	177.9
	1 hr	88.64	75.27	91.36	88.88	98.29	76.45						1 hr	87.33	87.62	116.33	122.69	81.78	88.73	86.08
	1 day	164.09		170.66	167.26								1 day	164.69	160.64		154.63	158.57		174.38
