# Supplementary material for: An inhibitory circuit from central amygdala to zona incerta drives pain-related behaviors in mice
Source: eLife. 2022 Oct 21;11:e68760. doi: 10.7554/eLife.68760 (PMC9635874; doi:10.7554/eLife.68760)
Supplement: Figure 4—figure supplement 2—source data 1. [file elife-68760-fig4-figsupp2-data1.xlsx]

## Sheet: Sheet1
Figure 4
Fig Supp 2
Figure 4C	Acetone
	Ipsilateral												Ipsilateral															Figure 4 - supplemental figure 2C	Data Structure	Type of Test	Sample Size	Statistical Data (Ipsilateral Paw)	Statistical Data (Contralateral Paw)
	Time after i.p. injection	Experimental Condition: Sham-Sal											Time after i.p. injection	Experimental Condition: Cuff-Sal														hM3Dq Acetone test	Normal distribution	Mixed-effects Model followed by Dunnett's multiple comparision test	hM3Dq-Sham = 6 mice per group; hM3Dq-Cuff = 8 mice per group; mCherry-Cuff = 8 mice	i.p treatment: F(2,46) = 0.7858 ; p = 0.4618	i.p treatment: F(2,46) = 0.2500 ; p = 0.7798
		ET8131	ET1534	ET1713	ET1712	ET1715	ET8443							ET800	ET779	ET780	ET972	ET1533	ET1714	ET8446	ET8444											brain and sciatic nerve treatments: F(4, 31) = 110; ****p < 0.0001	brain and sciatic nerve treatments: F(4, 31) = 3.025; p = 0.0324
	pre	0.2	0	0.2	0.2	0.2	0.2						pre	1	1.4	2	1.4	1.6	1.6	1.6	1.8											interaction F(8,46) = 0.4403, p = 0.8905	interaction F(8,46) = 1.160, p = 0.3432
	1 hr	0.2	0.2	0	0.4	0.2	0						1 hr	0.8	1.4	2	1.6	1.4	1.8	1.6	1.8
	1 day		0	0	0.2								1 day	1.2	1					2
		Experimental Condition: Sham-CNO												Experimental Condition: Cuff-CNO
		ET8131	ET1534	ET1715	ET1713	ET1712	ET8443							ET800	ET780	ET972	ET779	ET1533	ET1714	ET8444	ET8446
	pre	0	0	0.2	0	0.2	0						pre	1.2	1.6	1.2	1	1.6	1.6	1.6	2
	1 hr	0	0	0	0	0.2	0.4						1 hr	1.4	1.6	1.6	1.4	1.4	1.6	2	1.6
	1 day	0.2		0.2			0.2						1 day		2	1.4		1.6	1.6	1.8
	Contralateral												Contralateral
	Time after i.p. injection	Experimental Condition: Sham-Sal											Time after i.p. injection	Experimental Condition: Cuff-Sal
		ET8131	ET1534	ET1713	ET1712	ET1715	ET8443							ET800	ET779	ET780	ET972	ET1533	ET1714	ET8446	ET8444							Figure 4 - supplemental figure 2D	Data Structure	Type of Test	Sample Size	Statistical Data (Ipsilateral Paw)	Statistical Data (Contralateral Paw)
	pre	0	0	0	0.4	0	0						pre	0.4	0.4	0.4	0.4	0.4	0	0.4	0							hM3Dq Hargreaves	Normal distribution	Mixed-effects Model followed by Dunnett's multiple comparision test	hM3Dq-Sham = 6 mice per group; hM3Dq-Cuff = 8 mice per group; mCherry-Cuff = 8 mice	i.p. treatment: F(2,32) = 0.4157 ; p = 0.6634	i.p treatment: F(2,32) = 0.8809 ; p = 0.4242
	1 hr	0	0.2	0	0.2	0.2	0						1 hr	0	0.2	0.4	0.4	0	0.2	0	0.2											brain and sciatic nerve treatments: F(4, 21) = 217.1; ****p < 0.0001	brain and sciatic nerve treatments: F(4, 21) = 1.527; p = 0.2306
	1 day		0.4	0	0.2								1 day	0.2	0.4					0.2												interaction F(8,32) = 0.8282, p = 0.5843	interaction F(8,32) = 1.029, p = 0.4353
		Experimental Condition: Sham-CNO												Experimental Condition: Cuff-CNO
		ET8131	ET1534	ET1715	ET1713	ET1712	ET8443							ET800	ET780	ET972	ET779	ET1533	ET1714	ET8444	ET8446
	pre	0.4	0.4	0	0	0.2	0.2						pre	0.2	0.2	0.2	0.4	0.2	0.2	0.2	0.2
	1 hr	0	0	0.2	0	0.2	0						1 hr	0.4	0.4	0.4	0.2	0	0.4	0.2	0
	1 day	0		0			0						1 day		0.4	0.4		0.4	0	0
Figure 4D	Hargreaves
	Ipsilateral												Ipsilateral
	Time after i.p. injection	Experimental Condition: Sham-Sal											Time after i.p. injection	Experimental Condition: Cuff-Sal
		ET8443	ET1534	ET1713	ET1712	ET1715								ET8444	ET8446	ET1533	ET1714
	pre	9.864	9.358	8.768	9.25	8.952							pre	5.046	4.344	5.038	4.692
	1 hr	9.528	9.528	7.472	10.122	8.04							1 hr	4.87	4.808	4.488	4.626
	1 day	8.988		9.568	9.25								1 day	4.828		4.31	4.222
		Experimental Condition: Sham-CNO												Experimental Condition: Cuff-CNO
		ET8443	ET1534	ET1715	ET1713	ET1712								ET8446	ET8444	ET1533	ET1714
	pre	8.988	9.846	7.952	9.568	9.25							pre	4.552	4.828	4.31	4.222
	1 hr	9.15	9.084	8.564	7.842	8.386							1 hr	4.526	4.574	4.314	5.16
	1 day		9.358	8.952									1 day	4.344
	Contralateral												Contralateral
	Time after i.p. injection	Experimental Condition: Sham-Sal											Time after i.p. injection	Experimental Condition: Cuff-Sal
		ET8443	ET1534	ET1713	ET1712	ET1715								ET8444	ET8446	ET1533	ET1714
	pre	9.542	9.85	9.194	7.876	8.258							pre	8.488	10.514	8.794	8.088
	1 hr	10.066	8.834	8.574	8.516	7.674							1 hr	8.736	9.44	9.704	9.244
	1 day	8.834		9.524	8.84								1 day	10.574		9.61	8.542
		Experimental Condition: Sham-CNO												Experimental Condition: Cuff-CNO
		ET8443	ET1534	ET1715	ET1713	ET1712								ET8446	ET8444	ET1533	ET1714
	pre	8.834	9.916	9.16	9.524	8.84							pre	10.37	10.574	9.61	8.542
	1 hr	9.244	9.34	9.89	8.192	8.962							1 hr	8.97	9.728	9.63	8.466
	1 day		9.85	8.258									1 day	10.514
