# Supplementary material for: An inhibitory circuit from central amygdala to zona incerta drives pain-related behaviors in mice
Source: eLife. 2022 Oct 21;11:e68760. doi: 10.7554/eLife.68760 (PMC9635874; doi:10.7554/eLife.68760)
Supplement: Figure 4—source data 1. [file elife-68760-fig4-data1.xlsx]

## Sheet: Sheet1
Figure 4
Figure 4B
	Gq-mCherry Transduced Cells
RC Level	ET972	ET800	ET779	ET780	ET973	ET8446	ET8131	ET8444	ET2050	ET2033	ET1713	ET1714	ET1715	ET2034	ET1712	ET2048	ET2035
-1.06							5			13				18
-1.22							4
-1.34						63		12	3			7		90
-1.46							6			52
-1.58						68	4		1						4	17
-1.7	32	11	23			106	21		71		6	13		120	12	40
-1.82		31	32	10		112	45	56	5	70		19	27	127	37	52	6
-1.94							54	143			17	50				48
-2.06		43	52			119			75	40			99		70		12
-2.18		19	69			40	72	167	66		63		60		95		25
-2.3	107					68			19		44	58		49
-2.46				15			43				85			11
-2.54	67		49	16			1			5	72	47	156		93		57
-2.7	41		11					96	48								74
-2.8	96				8			36	11	3			115		83
-3.08													7
-3.16					21						25
	Mcherry Control Transduced Cells
RC Level	ET8448	ET1807	ET1808	ET1659	ET1658	ET2036	ET1480
-1.06	137			7
-1.22	22	0	9		2
-1.34	72	3	37			1	17
-1.46	73		35		44
-1.58	110	1			23		42
-1.7	56	7	36	9	95	74	117
-1.82	100		167		104	74	64
-1.94				45
-2.06	57		247		133
-2.18	97	29		99	173	33
-2.3			354			41
-2.46	37		247				55
-2.54	110	169		94	79
-2.7	71	130	331
-2.8				98		31
-3.08	18	15
-3.16	44		11
Figure 4E
Condition	hM3Dq-CNO								hM3Dq-Saline						mCherry-CNO				mCherry-Saline					Figure 4E	Data Structure	Type of Test	Sample Size	Statistical Data (Ipsilateral Paw)
Co-Labeled Cells	86	53	99	114	97	32	59		6	45	5	4	5		26	14	49		24	22	8	61		hM3Dq cFos	Normal distribution: HM3Dq-CNO and mCherry-CNO Non-normal distribution: HM3Dq- Saline	One-way ANOVA followed by Tukey’s multiple comparisons test	hM3Dq-CNO = 7 mice hM3Dq-Saline = 5 mice mCherry-CNO = 3 mice	One-way ANOVA: F(2,12) = 10.90; ***p < 0.001
																												posthoc: Tukey's test
																												**p < 0.01 for hM3Dq-CNO vs hM3Dq-Sal
Figure 4F																												*p < 0.05 for hM3Dq-CNO vs mCherry-CNO
	Ipsilateral												Ipsilateral
	Time after i.p. injection	Experimental Condition: Sham-Sal											Time after i.p. injection	Experimental Condition: Cuff-Sal
		ET8131	ET8443	ET1534	ET1713	ET1712	ET1715							ET972	ET800	ET779	ET780	ET8444	ET8446	ET1533	ET1714			Figure 4F	Data Structure	Type of Test	Sample Size	Statistical Data (Ipsilateral Paw)	Statistical Data (Contralateral Paw)
	pre	169.111	175.833	187.5	158.913	161.923	170						pre	77.6	80.3333	73.0526	68.2105	77.2353	84.3182	78.3158	79.1739			hM3Dq Pinching	Normal distribution	Mixed-effects Model followed by Dunnett's multiple comparision test	hM3Dq-Sham = 6 mice per group; hM3Dq-Cuff = 8 mice per group; mCherry-Cuff = 8 mice	i.p treatment: F(2,48) = 16.99; ****p < 0.0001	i.p.treatment: F(2,48) = 0.9387; p = 0.3982
	1 hr	165.348	178.2	185.105	161.087	128.24	156.962						1 hr	96	95.3158	86.7143	90.6087	71.9375	71.65	88	90.125							brain and sciatic nerve treatments: F(4,31) = 112.9; ****p < 0.0001	brain and sciatic nerve treatments: F(4,31) = 0.4981; p = 0.7372
	1 day		166.286		159.208								1 day	74.4118	89.9545	79.1333	92.5	85	83.8125	85.5								interaction: F(8,48) = 17.52, ****p < 0.0001	interaction: F(8,48) = 1.070, p = 0.3996
																												posthoc: Dunnett's test, 95.00% CI of diff. = -77.97 to -53.12, ****p < 0.0001 for pre-injections vs 1 h after CNO in cuff-hM3Dq mice
		Experimental Condition: Sham-CNO												Experimental Condition: Cuff-CNO
		ET8131	ET8443	ET1534	ET1712	ET1715	ET1713							ET972	ET800	ET779	ET780	ET8444	ET8446	ET1533	ET1714
	pre	171.812	167.957	160.364	146.046	169.13	159.208						pre	74.4118	89.9545	85.1111	82.4762	85	72.6667	85.5	67.3913
	1 hr	172.636	176.889	177.833	162.136	136.913	147.583						1 hr	172.1	110.038	159.933	161.737	151.864	143.812	144.524	122.87
	1 day	169.111	175.833	187.5	161.923	170							1 day			73.0526	68.2105	103.714	84.3182		79.1739
	Contralateral												Contralateral
	Time after i.p. injection	Experimental Condition: Sham-Sal											Time after i.p. injection	Experimental Condition: Cuff-Sal
		ET8131	ET8443	ET1534	ET1713	ET1712	ET1715							ET972	ET800	ET779	ET780	ET8444	ET8446	ET1533	ET1714
	pre	168.889	176.611	179.65	158.174	162.2	163.16						pre	186.65	177.5	160.632	164.21	172.294	178.682	181.842	166.364
	1 hr	165.609	178.95	186.368	160.783	149.792	169.56						1 hr	177.667	167.316	167.333	161.696	176.875	181.5	188.444	163.417
	1 day		174.357		162.875								1 day	170.235	174.136	166.933	163.2	178	164	180.778
		Experimental Condition: Sham-CNO												Experimental Condition: Cuff-CNO
		ET8131	ET8443	ET1534	ET1712	ET1715	ET1713							ET972	ET800	ET779	ET780	ET8444	ET8446	ET1533	ET1714
	pre	186.125	170.174	170.364	156.773	149.13	162.875						pre	169	174.136	181.778	175.105	178	176.556	180.778	145.826
	1 hr	174.864	190.111	179.444	161.636	142.435	136.125						1 hr	182.9	162.731	152	131.632	147.13	173.194	172.286	165.174
	1 day	168.889	176.611	179.65	162.2	163.16							1 day			161.3	164.21	177.143	178.682		166.364
