# Supplementary material for: An inhibitory circuit from central amygdala to zona incerta drives pain-related behaviors in mice
Source: eLife. 2022 Oct 21;11:e68760. doi: 10.7554/eLife.68760 (PMC9635874; doi:10.7554/eLife.68760)
Supplement: Figure 5—source data 1. [file elife-68760-fig5-data1.xlsx]

## Sheet: Sheet1
Figure 5
Figure 5C (Transduced cells)
Bregma	Control-mCherry										NpHR-mCherry
	6330	6311	6310	6459	6554	6798								6327	6462	6558	6476	6478	6779
-0.82				5	16	9										20	13
-0.94	9			13	37	36								9	2		34	34	35
-1.06	21	13	36	29		54								17	8	29	48		41
-1.22			46	43	127	59								24		57			45
-1.34	37	67	33	75	163	88								31	28	70		71	33
-1.46	66	95	61	80		85								47	49	68		69	28
-1.58	122	163	52	71	136	110								48	33	63	78	82	13
-1.7	84	87		123	103	89								22	40	53	73	46	5
-1.82	61	62	24		40	38									16		56	42	3
-1.94	14	12			16	21										19	18	28
Figure 5E
NpHR- (n=7)			NpHR+ (n=14)
# of Spikes			# of Spikes
Light OFF	Light ON		Light OFF	Light ON
9	7		8	1
6	5		10	0
6	7		7	3
6	5		6	0
7	5		6	3
5	3		9	0
8	8		9	0
			6	0
			8	0
			6	2
			6	0
			6	1
			5	0
			6	0
Figure 5E	Data Structure	Type of Test	Sample Size	Statistical Data
	Normal distribution	Two-way ANOVA followed by Šídák's multiple comparisons test	NpHR-positive = 14 cells	light and cell treatments interaction: F(1, 19) = 38.20; p<0.0001
			NpHR-negative = 7 cells	light treatment: F (1, 19) = 72.57; p<0.0001
				cell treatment: F (1, 19) = 22.76; p=0.0001
				posthoc: Šídák's multiple comparisons test
				****p < 0.0001 for light off vs light on in NpHR-positive cells
Figure 5F (left panel)	Control-mCherry										NpHR-mCherry													Figure 5F	Data Structure	Type of Test	Sample Size	Statistical Data (Treated Paw)	Statistical Data (Untreated Paw)
Pinch_Treated Paw	6330	6311	6310	6459	6555	6554	6798							6327	6462	6558	6478	6769	6476					NpHR Pincing (10 mW)	Normal distribution	Two-way Repeated Measures ANOVA followed by Dunnett's multiple comparisons test	Control-mCherry= 7 mice;NpHR-mCherry= 6 mice	light and brain treatments interaction: F (2, 22) = 300.0; ****p < 0.0001	light and brain treatments interaction: F (2, 22) = 2.380; p = 0.1160
OFF	90	84	75	87	92	87	89							80	86	91	84	97	86									light treatment: F (2, 22) = 339.3; ****p < 0.0001	light treatment: F (2, 22) = 0.3367; p = 0.7177
ON	94	86	93	86	88	93	89							189	192	195	185	180	190									brain treatment: F (1, 11) = 473.0; ****p < 0.0001	brain treatment:F (1, 11) = 2.278; p = 0.1594
OFF	87	85	83	93	85	83	95							85	84	82	91	103	89									posthoc: Dunnett's multiple comparisons test, 95.00% CI of diff. = -109.1 to -93.22, ****p < 0.0001 for light off vs light on in NpHR-mCherry mice
Figure 5F (right panel)	Control-mCherry										NpHR-mCherry
Pinch_Untreated Paw	6330	6311	6310	6459	6555	6554	6798							6327	6462	6558	6478	6769	6476
OFF	189	182	186	186	191	193	195							191	195	193	196	193	189
ON	188	186	192	190	195	195	198							189	189	190	191	196	191
OFF	190	191	190	191	187	190	194							196	194	196	190	189	194
Figure 5G	Control-mCherry										NpHR-mCherry													Figure 5G	Data Structure	Type of Test	Sample Size	Statistical Data (Treated Paw)
Intensity response_Treated Paw	6555	6554	6798	6330	6311	6310	6459				6327	M6	6558	6462	6769	6478	6476							NpHR Intensity response	Normal distribution	Two-way Repeated Measures ANOVA followed by Dunnett's multiple comparisons test	Control-mCherry= 3-7 mice;NpHTR-mCherry= 7 mice	light intensity and brain treatments interaction: F(5, 56) = 64.23; ****p < 0.0001
0.04	94	95	94								92	82	91	85	91	93	96											light intensity: F (1.683, 18.85) = 53.28; ****p < 0.0001
0.05	94	96	93								127	131	137	133	126	184	126											brain treatment: F (1, 56) = 1046; ****p < 0.0001
0.06	99	89	93								170	179	160	165	172	169	165
0.07	91	93	90	83	86	91	93				190	198	193	193	187	195	189
0.1	87	94	95								189	185	188	193	188	181	196
10	88	93	89	94	86	93	86				189	200	195	192	180	185	190
