# Supplementary material for: An inhibitory circuit from central amygdala to zona incerta drives pain-related behaviors in mice
Source: eLife. 2022 Oct 21;11:e68760. doi: 10.7554/eLife.68760 (PMC9635874; doi:10.7554/eLife.68760)
Supplement: Figure 6—source data 1. [file elife-68760-fig6-data1.xlsx]

## Sheet: Sheet1
Figure 6
Figure 6B	Control-mCherry																			Figure 6B	Data Structure	Type of Test	Sample Size	Statistical Data (Treated Paw)	Statistical Data (Untreated Paw)
VF_Treated Paw	6330	6311	6310	6459	6555	6554	6798				6327	6462	6558	6478	6769	6476				NpHR von Frey	Normal distribution	Two-way Repeated Measures ANOVA followed by Dunnett's multiple comparisons test	Control-mCherry= 7 mice; NpHR-mCherry= 6 mice	light and brain treatments interaction: F (3, 33) = 26.71; ****p < 0.0001	light and brain treatments interaction: F (3, 33) = 0.1554; p = 0.9255
OFF	0.044	0.07	0.07	0.07	0.0625	0.07	0.04				0.07	0.04	0.0625	0.0625	0.0475	0.055								light treatment: F (3, 33) = 28.79; ****p < 0.0001	light treatment:F (3, 33) = 0.8907; p = 0.4561
ON	0.25	0.07	0.07	0.07	0.07	0.07	0.0625				0.472	0.04	0.4	0.45	0.55	0.55								brain treatment: F (1, 11) = 26.42; ****p < 0.0001	brain treatment: F (1, 11) = 3.723; p = 0.0798
OFF	0.07	0.18	0.07	0.0625	0.0625	0.04	0.04				0.07	0.04	0.07	0.07	0.0625	0.07								posthoc: Dunnett's multiple comparisons test,95.00% CI of diff. = -0.4626 to -0.2456, ****p < 0.0001 for 0.07 mW and 95.00% CI of diff. = -0.5289 to -0.3119, ****p < 0.0001 for 10 mW light intensity for light off vs light on in NpHR-mCherry mice
ON	0.07	0.055	0.07	0.0625	0.0625	0.04	0.07				0.6	0.16	0.6	0.5	0.55	0.45
Figure 6B	Control-mCherry
VF_Untreated Paw	6330	6311	6310	6459	6555	6554	6798				6327	6462	6558	6478	6769	6476
OFF	0.4	0.6	0.6	0.55	0.45	0.6	0.6				0.6	0.4	0.6	0.5	0.55	0.5
ON	0.5	0.6	0.6	0.6	0.6	0.6	0.5				0.6	0.4	0.6	0.6	0.55	0.55
OFF	0.6	0.5	0.467	0.6	0.55	0.45	0.6				0.4	0.55	0.4	0.5	0.45	0.6
ON	0.6	0.55	0.467	0.6	0.55	0.5	0.5				0.4	0.6	0.6	0.5	0.4	0.6
																				Figure 6C	Data Structure	Type of Test	Sample Size	Statistical Data (Treated Paw)	Statistical Data (Untreated Paw)
Figure 6C	Control-mCherry																			NpHR Acetone test	Normal distribution	Two-way Repeated Measures ANOVA followed by Dunnett's multiple comparisons test	Control-mCherry= 7 mice; NpHR-mCherry= 6 mice	light and brain treatments interaction: F (3, 33) = 48.57; ****p < 0.0001	light and brain treatments interaction: F (3, 33) = 2.495; p = 0.0770
Acetone_Treated Paw	6330	6311	6310	6459	6555	6554	6798				6327	6462	6558	6478	6769	6476								light treatment: F (3, 33) = 48.57; ****p < 0.0001	light treatment: F (3, 33) = 0.7780; p = 0.5147
OFF	2	2	2	2	2	2	2				2	2	2	2	2	2								brain treatment: F(1, 11) = 143.3; ****p < 0.0001	brain treatment: F (1, 11) = 0.03751; p = 0.8500
ON	2	2	2	2	2	2	2				1	2	1	1	1	1								posthoc: Dunnett's multiple comparisons test,95.00% CI of diff. = 0.6377 to 1.029, ****p < 0.0001 for 0.07 mW and 95.00% CI of diff. = 0.8044 to 1.196, ****p < 0.0001 for 10 mW light intensity for light off vs light on in NpHR-mCherry mice	posthoc: Dunnett's multiple comparisons test, p = 0.7209 for 0.07 and p = 0,9487mW intensity of light off vs light on in NpHR-mCherry mice
OFF	2	2	2	2	2	2	2				2	2	2	2	2	2
ON	2	2	2	2	2	2	2				1	1	1	1	1	1
Figure 6C	Control-mCherry
Acetone_Untreated Paw	6330	6311	6310	6459	6555	6554	6798				6327	6462	6558	6478	6769	6476
OFF	0	0	0	0.5	0	0	0				0	0.5	0.5	0	0	0
ON	0	0	0	0	0	0	0				0	0.5	0	0	0	0
OFF	0	0	0	0.5	0.5	0.55	0				0	0	0	0	0	0
ON	0	0	0	0.5	0	0.5	0				0	0	0.5	0.25	0	0
																				Figure 6D	Data Structure	Type of Test	Sample Size	Statistical Data (Treated Paw)	Statistical Data (Untreated Paw)
Figure 6D	Control-mCherry																			NpHR Hargreaves test	Normal distribution	Two-way Repeated Measures ANOVA followed by Dunnett's multiple comparisons test	Control-mCherry= 7 mice; NpHR-mCherry= 6 mice	light and brain treatments interaction: F (3, 33) = 41.89; ****p < 0.0001	light and brain treatments interaction: F (3, 33) = 0.1591, p = 0.9231
Hargreaves_treated Paw	6330	6311	6310	6459	6555	6554	6798				6327	6462	6558	6478	6769	6476								light treatment: F (3, 33) = 40.88; ****p < 0.0001	light treatment: F (3, 33) = 0.2300; p = 0.8748
OFF	5.82	6.38	6.45	6.08	5.15	5.99	6.21				6.77	6.49	6.49	5.62	6.28	5.96								brain treatment: F (1, 11) = 122.3, ****p < 0.0001	brain treatment: F (1, 11) = 0.4414; p = 0.5201
ON	6.84	6.05	6.39	5.9	5.64	4.76	6.78				10.8	9.79	9.54	11.97	11.42	11.43								posthoc: Dunnett's multiple comparisons test, 95.00% CI of diff. = -5.619 to -3.49, ****p < 0.0001 for 0.07 mW and 95.00% CI of diff. = -5.353 to -3.227, ****p < 0.0001 for 10 mW light intensity for light off vs light on in NpHR-mCherry mice
OFF	6.82	7.11	6.49	5.64	6.43	5.08	5.47				5.69	6.58	4.54	5.32	6.69	6.41
ON	5.94	5.35	7.03	6.22	6.56	5.12	6.23				9.19	10.13	11.5	11.97	10.38	10.18
Figure 6D	Control-mCherry
Hargreaves_Untreated Paw	6330	6311	6310	6459	6555	6554	6798				6327	6462	6558	6478	6769	6476
OFF	9.62	10.77	9.49	9.68	10.45	10.91	10.6				11.32	10.28	10.92	9.98	10.11	10.8
ON	11.12	10.06	9.97	10.81	10.56	10	11.09				11.74	10.41	10.48	9.85	10.92	9.48
OFF	8.9	9.87	10.58	9.82	9.11	10.49	12.78				9.23	10.2	11.44	9.39	10.89	11.29
ON	10.51	9.79	10.89	10.27	10.18	9.46	10.54				10.83	10.19	10.54	10.43	9.8	10.08
