# Supplementary material for: An inhibitory circuit from central amygdala to zona incerta drives pain-related behaviors in mice
Source: eLife. 2022 Oct 21;11:e68760. doi: 10.7554/eLife.68760 (PMC9635874; doi:10.7554/eLife.68760)
Supplement: Figure 7—source data 1. [file elife-68760-fig7-data1.xlsx]

## Sheet: Sheet1
Figure 7
Figure 7C (Transduced Cells)	Control-mCherry									ChR2
	6330	6311	6310	6459	6554	6798				6305		6559	6464	6457
-0.82				5	16	9						7	29	10
-0.94	9			13	37	36						8	19	25
-1.06	21	13	36	29		54				14		12	27	26
-1.22			46	43	127	59						32	38	32
-1.34	37	67	33	75	163	88				33		45	62	70
-1.46	66	95	61	80		85				42		41		86
-1.58	122	163	52	71	136	110				54		31	81
-1.7	84	87		123	103	89						17	45	75
-1.82	61	62	24		40	38				29			21	29
-1.94	14	12			16	21						29	8	17
Figure 7G
Spike Fidelity	ChR2+ (n=11)	ChR2- (n=3)
1	7	0
0.5	2	0
0.4	1	0
0	1	3
Figure 7H (Left Panel)	Control										ChR2-mCherry														Figure 7H	Data Structure	Type of Test	Sample Size	Statistical Data (Treated Paw)	Statistical Data (Untreated Paw)
Pinch_Treated Paw	6330	6311	6310	6459	6555	6554	6798							6305	6464	6559	6457	6628	6615	6800					ChR2 Pincing (10 mW)	Normal distribution	Two-way Repeated Measures ANOVA followed by Dunnett's multiple comparisons test	Control-mCherry= 7 mice;ChR2-mCherry= 7 mice	light and brain treatments interaction: F (2, 24) = 0.4450; p = 0.6460	light and brain treatments interaction: F (2, 24) = 352.0; ****p < 0.0001
OFF	82	74	94	89	90	91	107							75	96	95	92	90	93	87									light treatment: F (2, 24) = 0.2333; p = 0.7937	light treatment:F (2, 24) = 314.7; ****p < 0.0001
ON	86	87	90	90	93	89	86							88	84	96	102	90	93	97									brain treatment: F (1, 12) = 0.8852; p = 0.3653	brain treatment: F (1, 12) = 220.6; ****p < 0.0001
OFF	88	83	94	81	94	93	95							87	100	88	94	94	90	93										posthoc: Dunnett's multiple comparisons test, 95.00% CI of diff. = 86.28 to 100.0, ****p < 0.0001 for light off vs light on in ChR2-mCherry mice
Figure 7H (Right Panel)	Control										ChR2-mCherry
Pinch_Untreated Paw	6330	6311	6310	6459	6555	6554	6798							6305	6464	6559	6457	6628	6615	6800
OFF	193	192	183	195	190	188	183							184	196	193	198	193	189	194
ON	190	190	199	189	193	191	194							97	113	106	113	92	86	88
OFF	186	188	188	193	188	195	194							191	190	192	194	188	189	192
Figure 7I	Control_Light ON										ChR2_Light ON														Figure 7I	Data Structure	Type of Test	Sample Size	Statistical Data (Untreated Paw)
Intensity response_Untreated Paw	6330	6311	6310	6459	6555	6554	6798				6305	M2	6559	6457	6464	6628	6615	6800							ChR2 Intensity response	Normal distribution	Two-way Repeated Measures ANOVA followed by Dunnett's multiple comparisons test	Control-mCherry= 2-7 mice;ChR2-mCherry= 3-8 mice	light intensity and brain treatments interaction: F (5, 31) = 75.51; ****p < 0.0001
0.1				194			194				193	193						191											light intensity: F (5, 31) = 77.96; ****p < 0.0001
0.5				190			190				198	196						191											brain treatment: F (1, 13) = 313.9; ****p < 0.0001
0.6				191			192				190	190	165	164	176			173
0.7				187			191				121	132	128	123	126			125
0.8	189	187	191	191	192	190	191				81	92	104	106	110	91	86	86
10	190	190	199	189	193	191	194				93	95	106	113	113	92	94	85
