# Supplementary material for: An inhibitory circuit from central amygdala to zona incerta drives pain-related behaviors in mice
Source: eLife. 2022 Oct 21;11:e68760. doi: 10.7554/eLife.68760 (PMC9635874; doi:10.7554/eLife.68760)
Supplement: Figure 8—source data 1. [file elife-68760-fig8-data1.xlsx]

## Sheet: Sheet1
Figure 8
Figure 8B	Control-mCherry
VF_Treated Paw	6330	6311	6310	6459	6555	6554	6798				6305	6464	6559	6457	6628	6615	6800			Figure 8B	Data Structure	Type of Test	Sample Size	Statistical Data (Treated Paw)	Statistical Data (Untreated Paw)
OFF	0.0625	0.055	0.0625	0.04	0.04	0.04	0.045				0.0625	0.07	0.07	0.055	0.07	0.07	0.045			ChR2 von Frey	Normal distribution	Two-way Repeated Measures ANOVA followed by Dunnett's multiple comparisons test	Control-mCherry= 7 mice; ChR2-mCherry= 7 mice	light and brain treatments interaction: F (3, 36) = 1.511; p = 0.2282	light and brain treatments interaction:F (3, 36) = 120.8; ****p < 0.0001
ON	0.07	0.07	0.07	0.04	0.04	0.04	0.07				0.055	0.0625	0.055	0.0475	0.055	0.045	0.07							light treatment: F (3, 36) = 1.287; p = 0.2937	light treatment: F (3, 36) = 92.80; ****p < 0.0001
OFF	0.07	0.04	0.0625	0.0625	0.07	0.03	0.0625				0.07	0.07	0.07	0.0625	0.0625	0.0625	0.055							brain treatment: F (1, 12) = 2.390; p = 0.1481	brain treatment: F (1, 12) = 60.38; ****p < 0.0001
ON	0.07	0.04	0.0625	0.07	0.07	0.04	0.0625				0.07	0.07	0.07	0.07	0.0625	0.055	0.055								posthoc: Dunnett's multiple comparisons test,95.00% CI of diff. = 0.3811 to 0.4896, ****p < 0.0001 for 0.8 mW and 95.00% CI of diff. = 0.3693 to 0.4778, ****p < 0.0001 for 10 mW light intensity for light off vs light on in ChR2-mCherry mice
Figure 8B	Control-mCherry
VF_Untreated Paw	6330	6311	6310	6459	6555	6554	6798				6305	6464	6559	6457	6628	6615	6800
OFF	0.6	0.6	0.5	0.55	0.4	0.4	0.55				0.6	0.55	0.4	0.4	0.5	0.55	0.5
ON	0.6	0.6	0.6	0.6	0.4	0.4	0.6				0.07	0.07	0.07	0.07	0.0475	0.07	0.055
OFF	0.6	0.5	0.467	0.5	0.4	0.4	0.55				0.4	0.4	0.4	0.4	0.4	0.45	0.5
ON	0.6	0.55	0.467	0.6	0.4	0.4	0.6				0.04	0.0925	0.115	0.115	0.0625	0.055	0.055
Figure 8C	Control-mCherry																			Figure 8C	Data Structure	Type of Test	Sample Size	Statistical Data (Treated Paw)	Statistical Data (Untreated Paw)
Acetone_Treated Paw	6330	6311	6310	6459	6555	6554	6798				6305	6464	6559	6457	6628	6615	6800			ChR2 Acetone test	Normal distribution	Two-way Repeated Measures ANOVA followed by Dunnett's multiple comparisons test	Control-mCherry= 7 mice; ChR2-mCherry= 7 mice	light and brain treatments interaction: F (3, 36) = 0.2698; p = 0.8467	light and brain treatments interaction:F (3, 36) = 4.817; p = 0.0064
OFF	2	2	2	2	2	2	2				2	2	2	2	2	2	2							light treatment:F (3, 36) = 3.418; p = 0.0274	light treatment: F (3, 36) = 4.760; p = 0.0068
ON	2	2	2	2	2	2	2				2	2	2	2	2	2	2							brain treatment: F (1, 12) = 0.3386; p = 0.5714	brain treatment: F (1, 12) = 29.45; p = 0.0002
OFF	2	2	2	1.6	1	2	2				2	1.6	1.6	2	2	2	2							posthoc: Dunnett's multiple comparisons test, p > 9999 for 0.8 and p = 0.8272 for 10 mW intensity of light off vs light on in ChR2-mCherry mice	posthoc: Dunnett's multiple comparisons test, : 95.00% CI of diff. = -1.324 to -0.3905, ***p = 0.0002.for 0.8 mW and 95.00% CI of diff. = -1.145 to -0.2119, **p = 0.0030 for 10 mW intensity of light off vs light on in ChR2-mCherry mice
ON	2	2	2	1.6	1.61	2	2				2	2	1.6	2	2	2	2
Figure 8C	Control-mCherry
Acetone_Untreated Paw	6330	6311	6310	6459	6555	6554	6798				6305	6464	6559	6457	6628	6615	6800
OFF	0	0	0.25	0	0.25	0	0				0	0	0.25	0.5	0	0	0
ON	0	0	0	0	0.25	0.25	0				1	1	0.75	1	1	1	1
OFF	0	0	0	1	0	0	0				0	0.7	0	1	0	0	0
ON	0	0	0	1	0	0	0				1.75	0	0.75	0	1	1	1
Figure 8D	Control-mCherry																			Figure 8D	Data Structure	Type of Test	Sample Size	Statistical Data (Treated Paw)	Statistical Data (Untreated Paw)
Hargreaves_treated Paw	6330	6311	6310	6459	6555	6554	6798				6305	6464	6559	6457	6628	6615	6800			ChR2 Hargreaves test	Normal distribution	Two-way Repeated Measures ANOVA followed by Dunnett's multiple comparisons test	Control-mCherry= 7 mice; ChR2-mCherry= 7 mice	light and brain treatments interaction: F (3, 36) = 2.020; p = 0.1284	light and brain treatments interaction: F (3, 36) = 19.54; p < 0.0001
OFF	5.65	6.06	6.48	6.07	5.67	6.74	5.71				7.25	5.61	6.92	6.88	6.23	7.27	6.85							light treatment: F (3, 36) = 0.9690; p = 0.4180	light treatment: F (3, 36) = 12.90; p < 0.0001
ON	6.99	5.47	6.28	6.69	7.07	6.17	6.11				6.7	5.47	5.49	6.79	4.99	6.3	5.02							brain treatment: F (1, 12) = 1.420; p = 0.2564	brain treatment: F (1, 12) = 69.76; p < 0.0001
OFF	5.68	6.37	7.26	5.47	5.26	5.54	6.5				6.5	6.64	6.1	4.98	5.93	5.59	5.3								posthoc: Dunnett's multiple comparisons test 95.00% CI of diff. = 2.249 to 4.771, ****p < 0.0001 for 0.8 mW and 95.00% CI of diff. = 2.451 to 4.972, ****p < 0.0001 for 10 mW intensity of light off vs light on in ChR2-mCherry mice
ON	6.65	7.11	5.79	6.71	7.51	5.53	6.7				5.64	5.82	4.08	6.4	7.53	6.26	6.43
Figure 8D	Control-mCherry
Hargreaves_Untreated Paw	6330	6311	6310	6459	6555	6554	6798				6305	6464	6559	6457	6628	6615	6800
OFF	10.75	9.87	10.53	10.25	11.19	9.11	10.24				8.8	10.2	10.85	10.34	11.1	9.84	9.61
ON	10.93	9.76	10.84	10.95	11.34	9.97	10.75				5.63	7.46	6.79	6.23	6.65	7.62	5.79
OFF	9.66	10.17	9.68	7.7	10.31	12.35	10.37				9.41	9.77	8.26	10.12	9.2	12.1	11.09
ON	9.34	9.55	9.27	11.97	10.02	12.21	10.61				5.33	6.84	6.52	6.98	6.29	6.69	6.11
