# Supplementary figures and images for: An inhibitory circuit from central amygdala to zona incerta drives pain-related behaviors in mice
Source: eLife journal article supplement (doi:10.7554/elife.68760), 2022-10-21

**Figure 4- figure supplement 1**

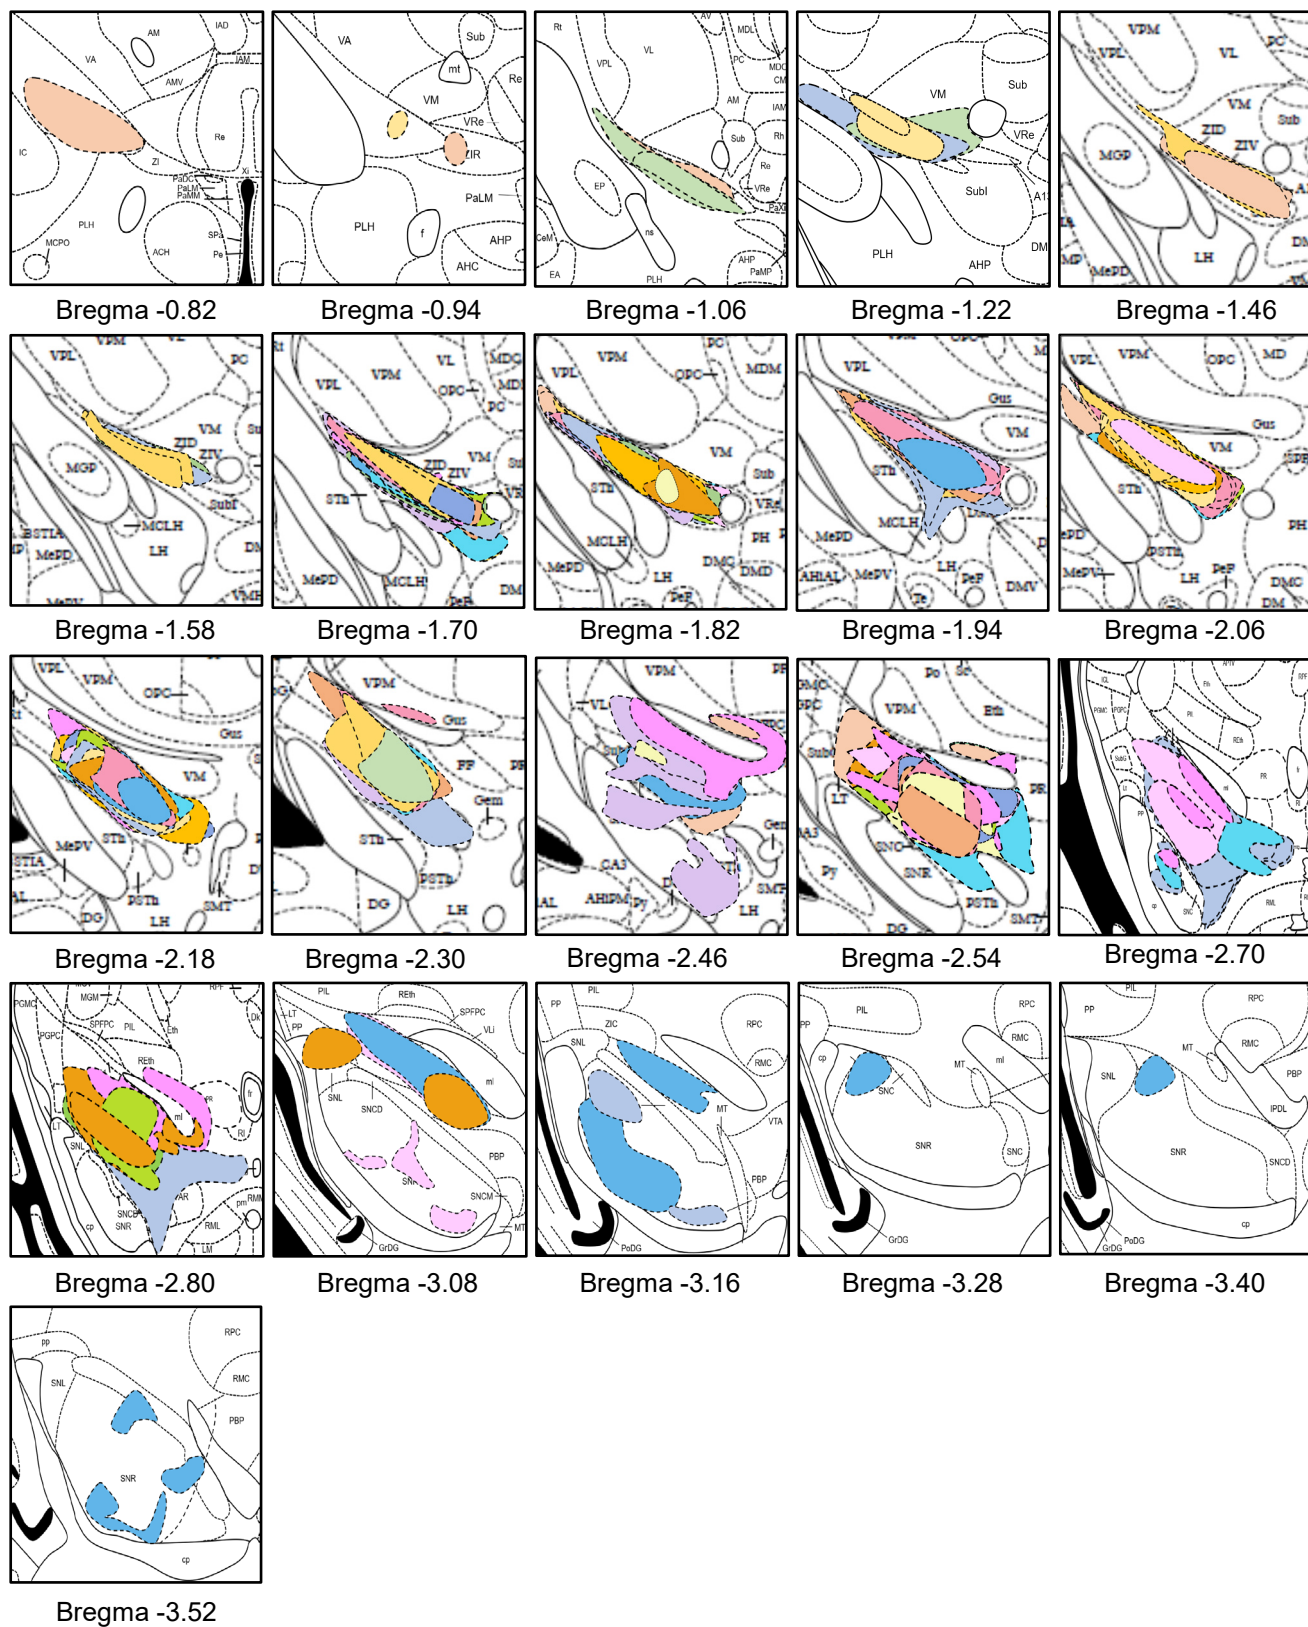

Supplement: supp [file elife-68760-supp-v1.zip]

Figure 1- figure supplement 2

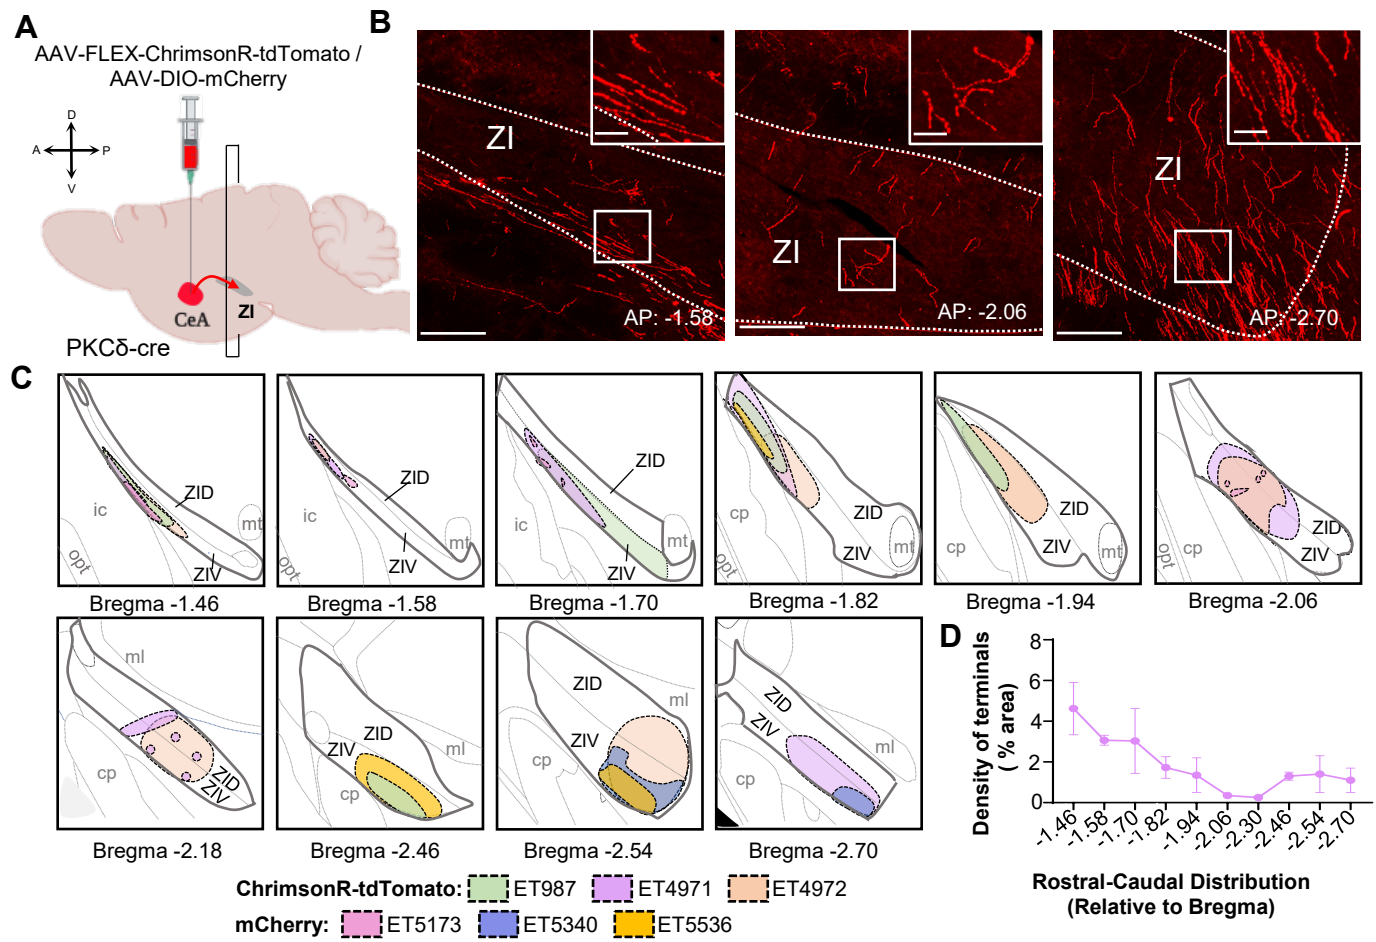

Supplement: supp [file elife-68760-supp-v1.zip]

**Figure 5- figure supplement 1**

**A**

**Control-mCherry**

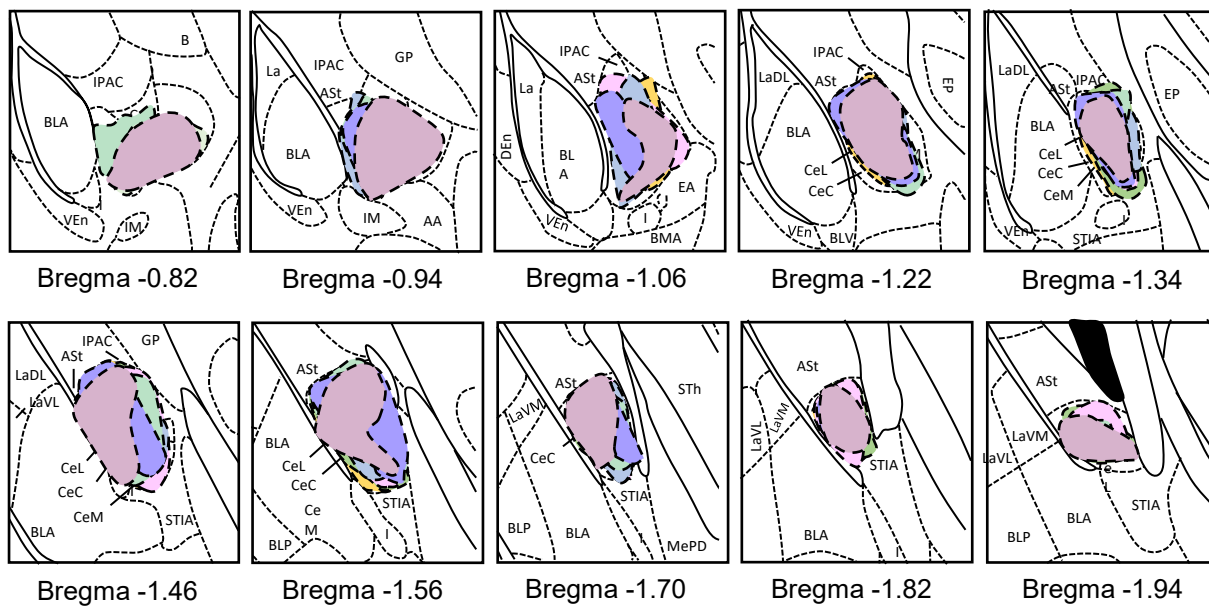

**B**

**NpHR-mCherry**

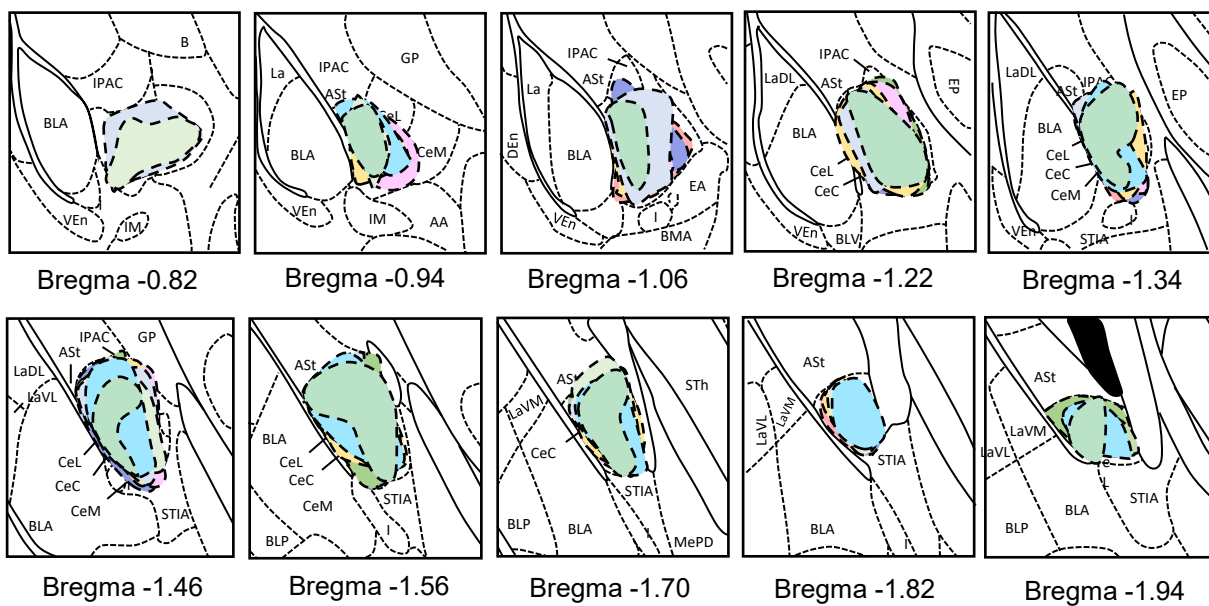

**C**

**ChR2-mCherry**

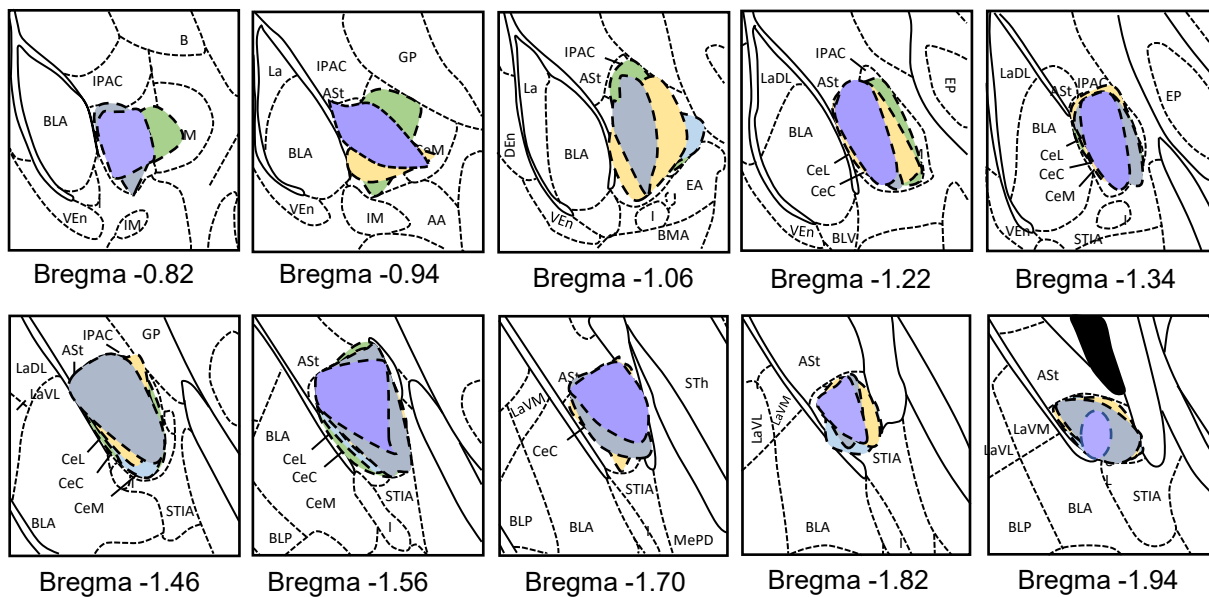

Supplement: supp [file elife-68760-supp-v1.zip]

Figure 2- figure supplement 1

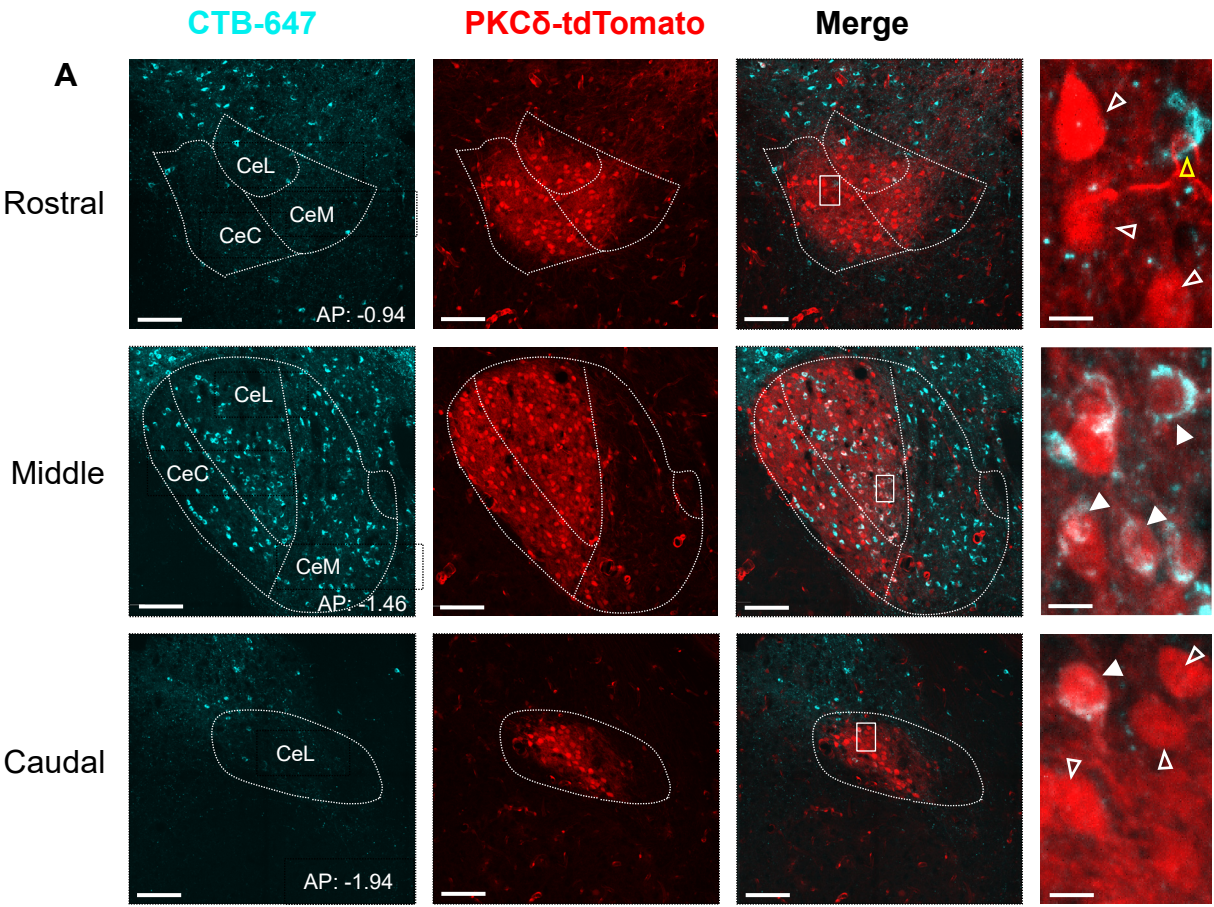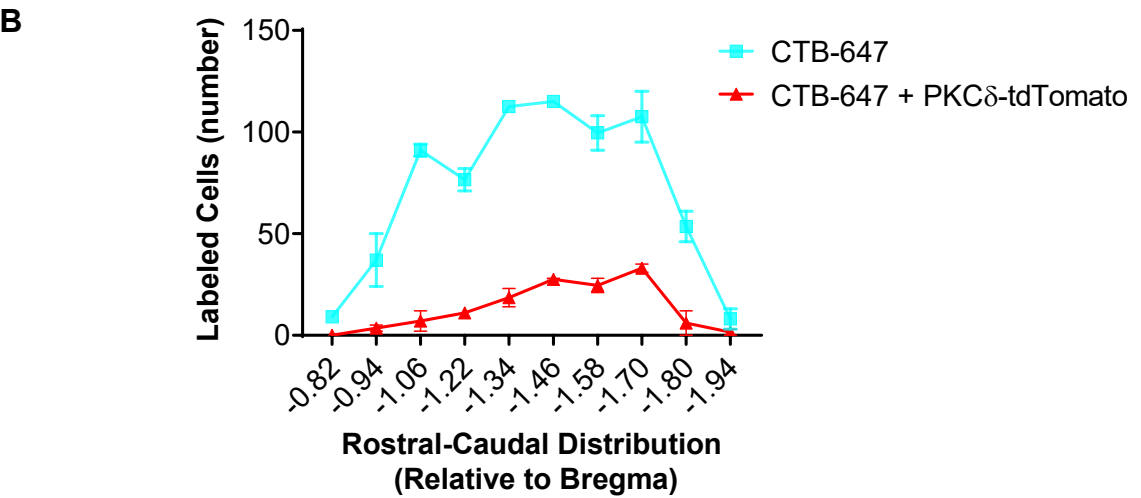

Supplement: supp [file elife-68760-supp-v1.zip]

Figure 1- figure supplement 1

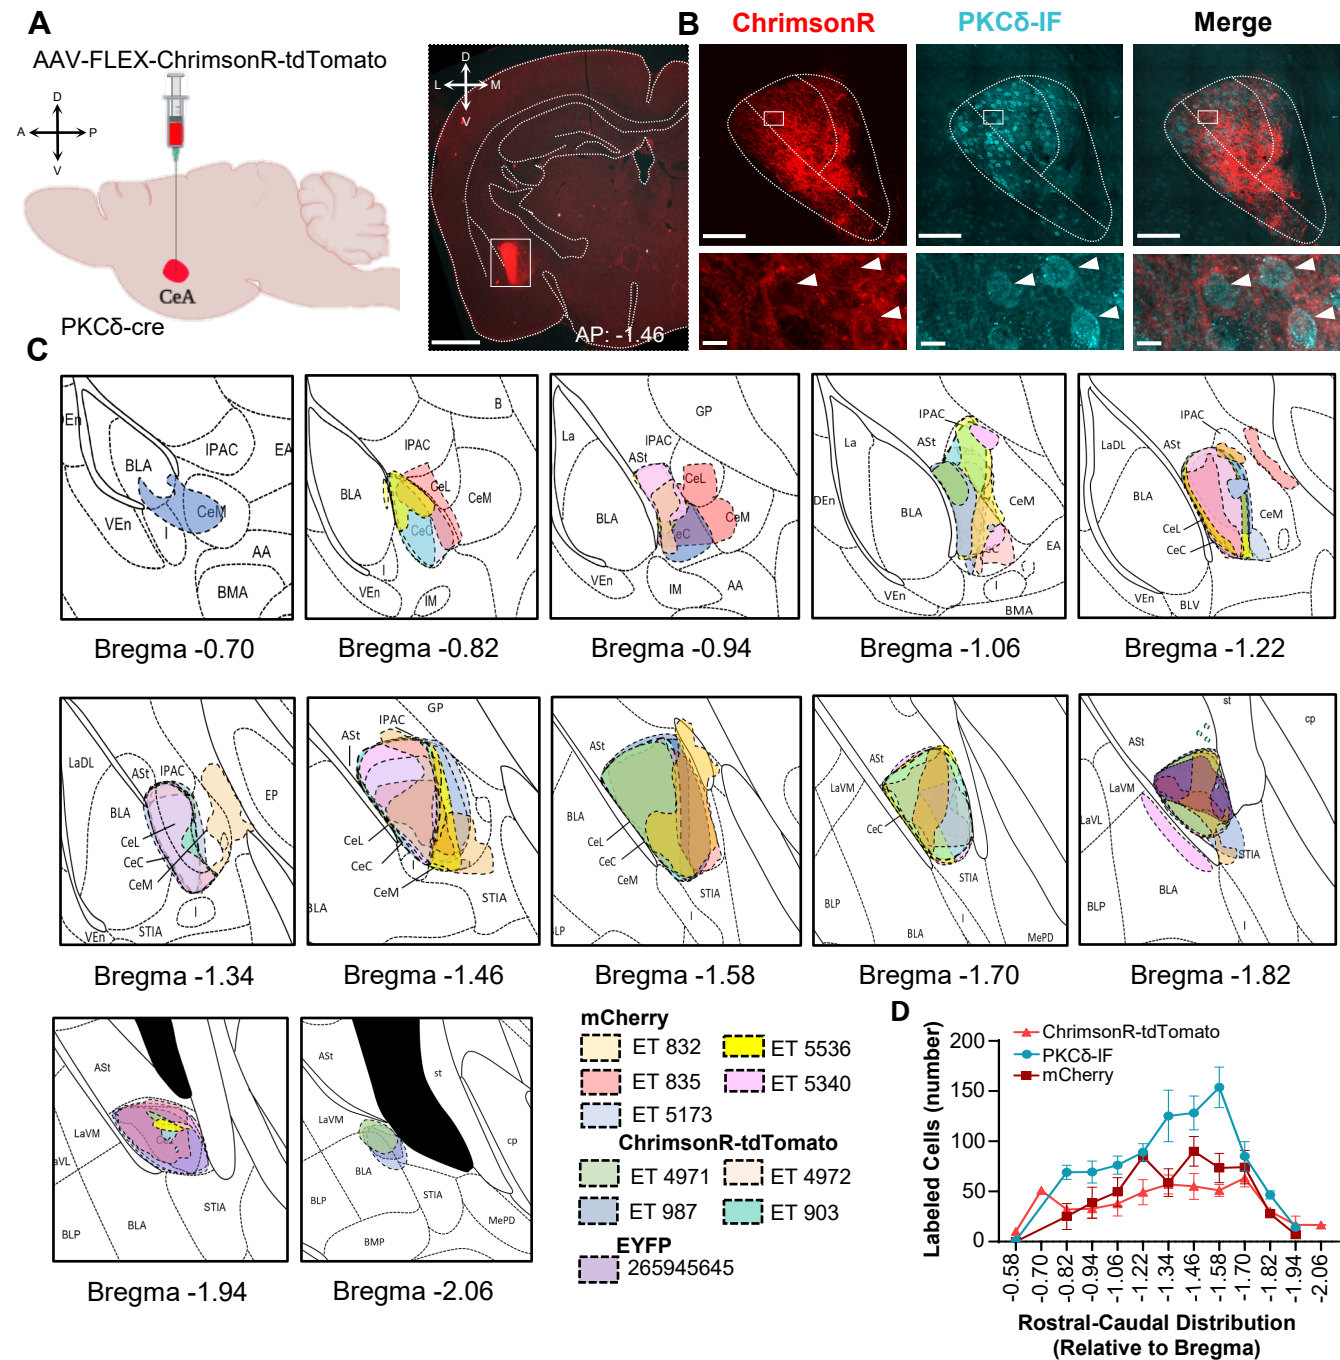

Supplement: supp [file elife-68760-supp-v1.zip]

### Figure 3- figure supplement 1

**A**

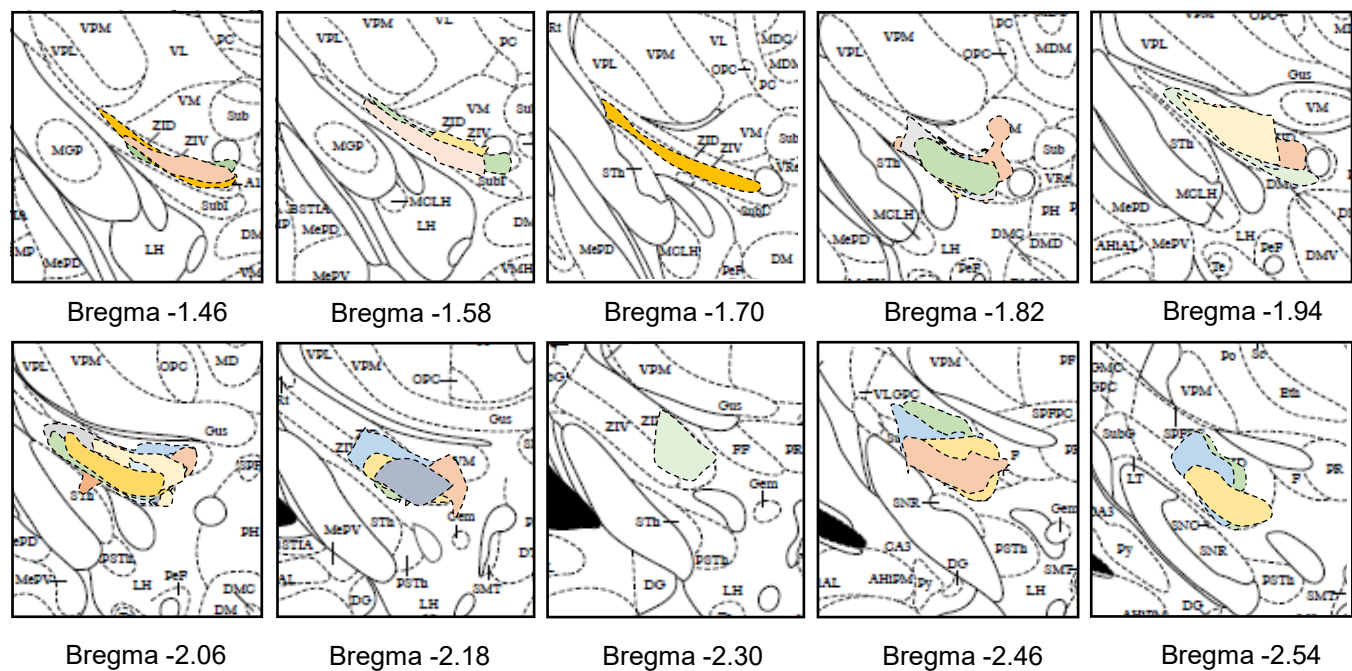

**B**

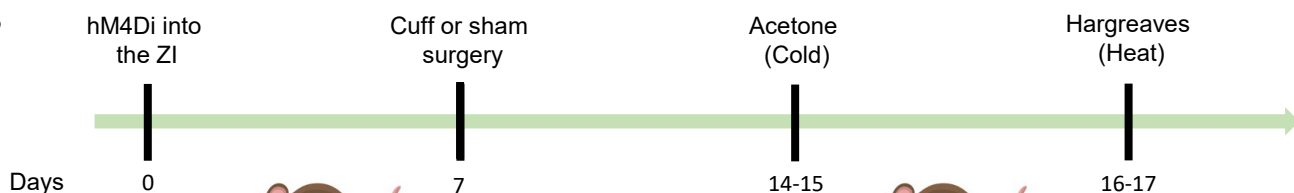

**C**

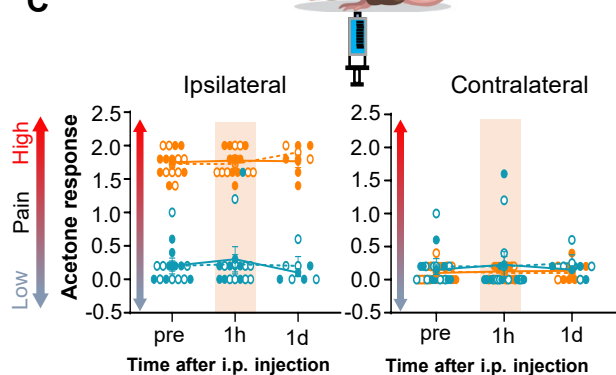

D

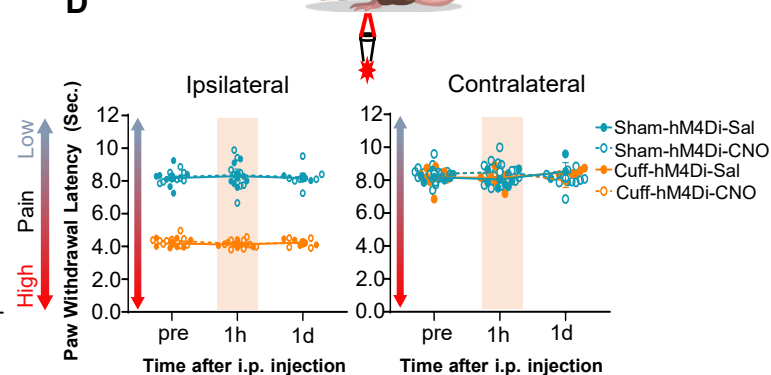

Supplement: supp [file elife-68760-supp-v1.zip]

Figure 4- figure supplement 2

A

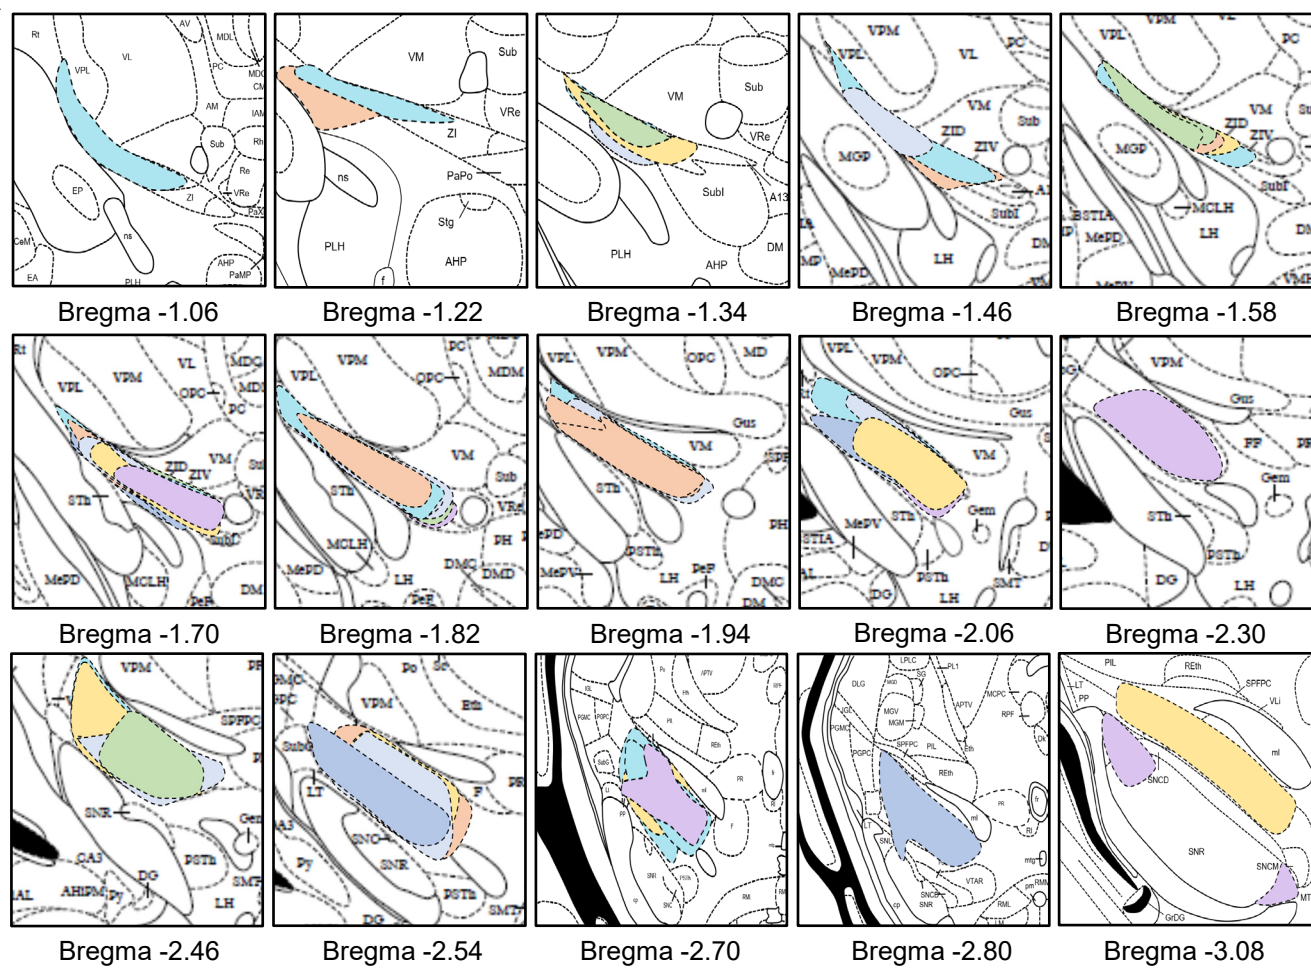

B

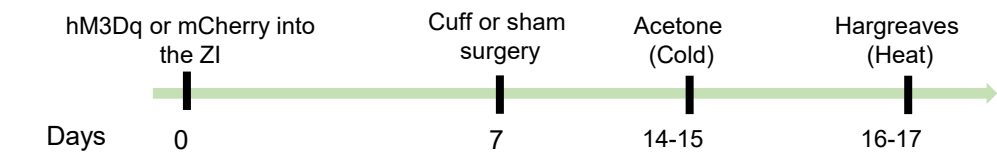

C

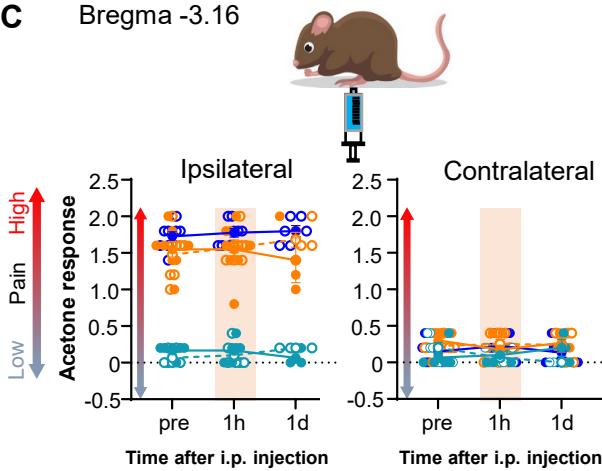

D

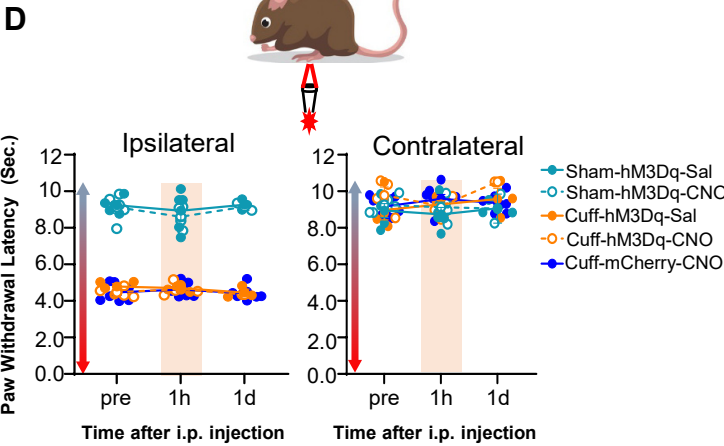

Supplement: supp [file elife-68760-supp-v1.zip]
